# Supplementary material
Source: publisher figshare collection journal article supplement (https://acs.figshare.com/ndownloader/files/4633849)

**Supporting Information for the following manuscript:**

**New substituted tetrathiafulvalene-quinone dyads: the influences of  
electron accepting abilities of quinone units on the metal ion-promoted  
electron-transfer processes**

Hui Wu, Deqing Zhang,\* Guanxin Zhang, Daoben Zhu\*

**Contents**

|                                                                                                                                                                                             |         |
|---------------------------------------------------------------------------------------------------------------------------------------------------------------------------------------------|---------|
| 1. Synthesis of dyads <b>1</b> , <b>2</b> , <b>3</b> , and <b>4</b> and compounds <b>12</b> , <b>13</b> , <b>14</b> , and <b>15</b> .....                                                   | S2-S7   |
| 2. Absorption spectra of dyads <b>1</b> , <b>2</b> , <b>3</b> , and <b>4</b> in the presence of metal ions.....                                                                             | S8-S13  |
| 3. Absorption spectra of <b>6</b> after chemical and electrochemical oxidations as well as<br>those of <b>6</b> , <b>12</b> and the mixture of <b>6</b> and <b>12</b> .....                 | S14     |
| 4. ESR spectra of <b>2</b> , <b>3</b> , <b>4</b> , and <b>5</b> in the presence metal ions.....                                                                                             | S15-S16 |
| 5. Cyclic voltammograms of <b>1</b> , <b>2</b> , <b>3</b> , and <b>4</b> , and compounds <b>12</b> , <b>13</b> , <b>14</b> , and <b>15</b><br>and those in the presence of metal ions.....  | S17-S25 |
| 6. The <sup>1</sup> H NMR and <sup>13</sup> C NMR of dyads <b>1</b> , <b>2</b> , <b>3</b> , and <b>4</b> and compounds <b>7</b> , <b>8</b> , <b>10</b> ,<br><b>12</b> , and <b>15</b> ..... | S26-S34 |

# 1. Synthesis of dyads 1, 2, 3, and 4 and compound 12 and 15.

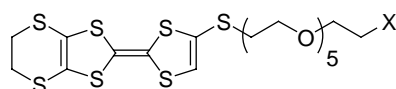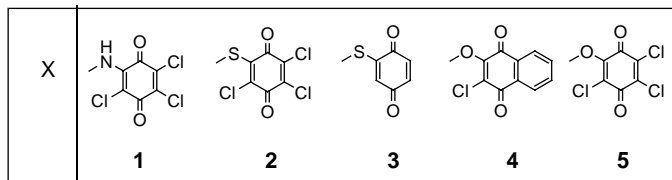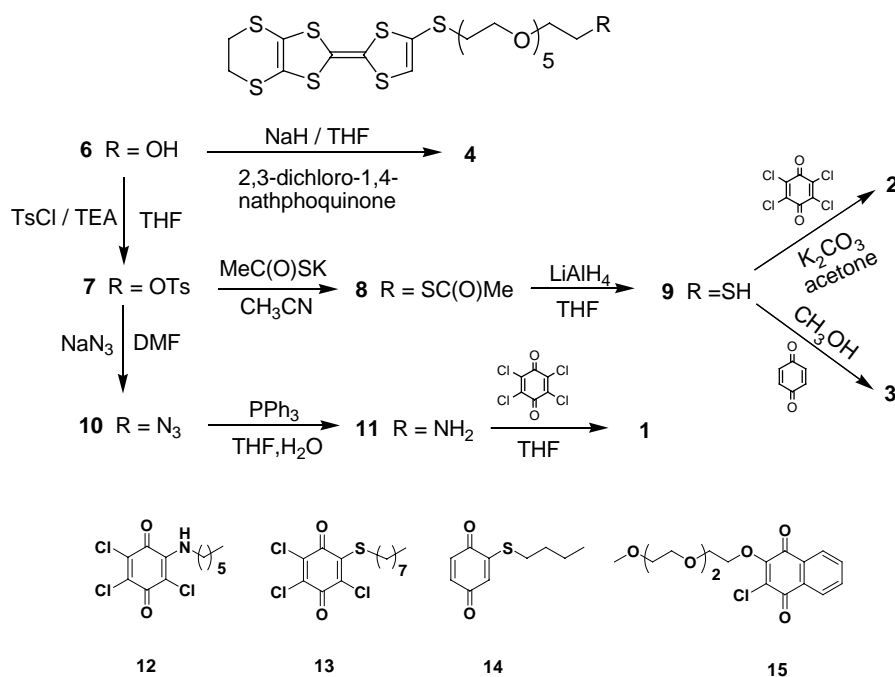

**General methods.**  $^1\text{H}$ -NMR,  $^{13}\text{C}$ -NMR, MS (including HRMS), absorption, and ESR spectra were recorded with conventional spectrometers. Cyclic voltammetric measurements were performed in a standard three-electrode cell, with Pt as the working and counter electrodes, and Ag/AgCl electrode (saturated KCl) as the reference electrode. The scan rate was 100 mV/s, and  $n\text{-Bu}_4\text{NPF}_6$  (0.1 M) was used as supporting electrolyte.

All solvents were purified and dried following standard procedures unless otherwise stated. Compound **13**<sup>a</sup> and **14**<sup>b</sup> was synthesized according to the literature :

(a) Grennberg, H.; Gogoll, A.; Backvall, J-E. *J. Org. Chem.* **1991**, 56, 5808-5811.

(b) Wu, H.; Zhang, D.; Zhu, D. *Tetrahedron Lett.* **2007**, 48, 8951-8955.

**Compound 7** To a magnetically stirred solution of **6** (0.59 g, 1.0 mmol) and p-toluenesulfonyl chloride (0.29 g, 1.5 mmol) in 50 mL dry CH<sub>2</sub>Cl<sub>2</sub> at ambient temperature under N<sub>2</sub> atmosphere was added dropwise the solution of triethylamine (1 mL, 7.2 mmol) in 10 mL CH<sub>2</sub>Cl<sub>2</sub>. The reaction mixture was then slowly warmed to reflux. After being refluxed for 8 h the mixture was cooled to ambient temperature and the solvents were removed under reduced pressure to give a yellow oil. After column chromatography on silica gel with CH<sub>2</sub>Cl<sub>2</sub>/EtOAc (5 : 1, v/v) as eluant, **7** (0.63 g) was obtained as a yellow oil in 85% yield. <sup>1</sup>H NMR (400 MHz, CDCl<sub>3</sub>): δ 7.80 (2H, d, *J* = 7.9 Hz), 7.34 (2H, d, *J* = 7.9 Hz), 6.43 (1H, s), 4.16 (2H, t, *J* = 4.7 Hz), 3.70-3.58 (20H, m), 3.29 (4H, s), 2.93 (2H, t, *J* = 6.4 Hz), 2.45 (3H, s); <sup>13</sup>C NMR (100 MHz, CDCl<sub>3</sub>): δ 144.8, 133.0, 129.8, 128.0, 126.5, 122.9, 117.8, 113.9, 113.8, 106.5, 70.7, 70.6, 70.55, 70.52, 70.46, 69.6, 69.3, 68.6, 35.3, 30.2, 21.6; HR-MS (MALDI-TOF) calcd. for C<sub>27</sub>H<sub>36</sub>O<sub>8</sub>S<sub>8</sub>: 744.0176; found: 744.0170.

**Compound 8** Potassium thioacetate (91 mg, 0.8 mmol) was added to a solution of **7** (0.29 g, 0.4 mmol) in dry CH<sub>3</sub>CN (25 mL). The reaction mixture was heated at 60 °C for 4 h before 50 mL of H<sub>2</sub>O was added. The aqueous solution was extracted with CH<sub>2</sub>Cl<sub>2</sub> (2 × 50 mL). The combined organic phases were washed with water (50 mL) and brine (50 mL), dried over Na<sub>2</sub>SO<sub>4</sub>, and concentrated in vacuo. After column chromatography on

silica gel with CH<sub>2</sub>Cl<sub>2</sub>/EtOAc (6: 1, v/v) as eluant, **8** was obtained as a yellow oil (0.24 g) in 92 % yield. <sup>1</sup>H NMR (400 MHz, CDCl<sub>3</sub>): δ 6.43 (1H, s), 3.67-3.63 (20H, m), 3.29 (4H, s), 3.09 (2H, t, *J* = 6.4 Hz), 2.93 (2H, t, *J* = 6.4 Hz), 2.34 (3H, s); <sup>13</sup>C NMR (100 MHz, CDCl<sub>3</sub>): δ 195.4, 126.5, 122.9, 117.8, 113.9, 113.8, 106.6, 70.59, 70.56, 70.47, 70.3, 69.7, 69.6, 35.2 30.6, 30.2, 28.8; HR-MS (MALDI-TOF) calcd. for C<sub>22</sub>H<sub>32</sub>O<sub>6</sub>S<sub>8</sub>: 647.9965; found: 647.9958.

**Compound 10** A solution of **7** (0.74 g, 1.0 mmol) in dry DMF (30 mL) was treated with NaN<sub>3</sub> (0.28 g, 5.0 mmol) at 25°C under N<sub>2</sub>. The resulting reaction mixture was warmed at 80°C for 12 h before 30 mL of H<sub>2</sub>O was added. The aqueous solution was extracted with dichloromethane (3×50 mL), and the combined extracts were washed with H<sub>2</sub>O (2×50 mL) and saturated aqueous NaCl (20 mL), dried (MgSO<sub>4</sub>) and concentrated in vacuo. After column chromatography on silica gel with CH<sub>2</sub>Cl<sub>2</sub>/ EtOAc (6:1, v/v) as eluant, **10** was obtained as an orange oil (0.55 g) in 90% yield. <sup>1</sup>H NMR (400 MHz, CDCl<sub>3</sub>): δ 6.60-6.20 (1H, br), 3.66-3.63 (20H, m), 3.39 (2H, t, *J* = 4.7 Hz), 3.29 (4H, s), 2.93 (2H, t, *J* = 6.4 Hz); <sup>13</sup>C NMR (100 MHz, CDCl<sub>3</sub>): δ 126.4, 122.8, 117.8, 113.81, 113.76, 106.5, 70.54, 70.47, 70.39, 69.9, 69.5, 50.6, 35.2, 30.1; HR-MS (MALDI-TOF) calcd. for C<sub>20</sub>H<sub>29</sub>N<sub>3</sub>O<sub>5</sub>S<sub>7</sub>: 615.0152; found: 615.0160 .

**Dyad 2** A solution of **8** (130 mg, 0.2 mmol) in dry THF (15 mL) was treated with LiAlH<sub>4</sub> (30 mg, 0.8 mmol) at 0 °C under N<sub>2</sub>. After being stirred for 30 min, the reaction mixture was quenched with water (25 mL), and the resulting mixture was extracted with CH<sub>2</sub>Cl<sub>2</sub> (2 × 25 mL). The combined organic layers were washed with water, dried (Na<sub>2</sub>SO<sub>4</sub>), and concentrated to give crude **9** as a yellow oil that was used directly without further purification.

To a solution of previously obtained crude oil product **9** in dry acetone was added  $\text{KCO}_3$  (69 mg, 0.5 mmol) under  $\text{N}_2$  atmosphere at room temperature. The mixture was stirred for 10 min whereupon tetrachloro-1,4-benzoquinone (124 mg, 0.5 mmol) was added. After being stirred for 30 min the reaction mixture was filtered. The filtrate was concentrated in vacuo. After column chromatography on silica gel with  $\text{CH}_2\text{Cl}_2/\text{EtOAc}$  (5: 1, v/v) as eluant, **2** was obtained as a red oil (67 mg) in 41 % yield.  $^1\text{H}$  NMR (400 MHz,  $\text{CDCl}_3$ ):  $\delta$  6.60-6.20 (1H, br), 3.74 (2H, t,  $J = 5.5$  Hz) 3.65-3.61 (10H, m), 3.57-3.54 (8H, m), 3.47 (2H, t,  $J = 5.5$  Hz) 3.28 (4H, s), 2.92 (2H, t,  $J = 6.5$  Hz);  $^{13}\text{C}$  NMR (100 MHz,  $\text{CDCl}_3$ ):  $\delta$  172.7, 169.0, 147.8, 141.3, 140.2, 136.2, 126.6, 123.1, 114.09, 114.07, 71.4, 70.74, 70.68, 70.66, 70.60, 69.7, 35.3, 33.9, 30.3; MS (MALDI-TOF)  $m/z$  814.3 ( $\text{M}^+$ ); HR-MS (MALDI-TOF) calcd. for  $\text{C}_{26}\text{H}_{29}\text{Cl}_3\text{O}_7\text{S}_8$ : 813.8745; found: 813.8715.

**Dyad 3** A solution of crude product **9** (126 mg) in  $\text{CH}_2\text{Cl}_2$  (5mL) was added to a suspension of 1,4-benzoquinone (108 mg, 1.0 mmol) in methanol (25 mL). The mixture was stirred for 10 min. Water (25 mL) was added, and the resulting mixture was extracted with  $\text{CH}_2\text{Cl}_2$  ( $2 \times 25$  mL). The combined organic layers were washed with water, dried ( $\text{Na}_2\text{SO}_4$ ), and concentrated. After column chromatography on silica gel with  $\text{CH}_2\text{Cl}_2/\text{EtOAc}$  (5: 1, v/v) as eluant, **3** was obtained as a yellow oil (74 mg) in 52 % yield.  $^1\text{H}$  NMR (400 MHz,  $\text{CDCl}_3$ ):  $\delta$  6.79 (1H, d,  $J = 10$  Hz), 6.71 (1H, dd,  $J = 10, 2$  Hz), 6.45 (1H, d,  $J = 2$  Hz), 6.42 (1H, s), 3.76 (2H, t,  $J = 6.3$  Hz), 3.66-3.61 (18H, m), 3.27 (4H, s), 2.99 (2H, t,  $J = 6.3$  Hz), 2.91 (2H, t,  $J = 6.7$  Hz);  $^{13}\text{C}$  NMR (100 MHz,  $\text{CDCl}_3$ ):  $\delta$  183.9, 183.7, 152.5, 137.3, 136.0, 126.5, 124.9, 122.9, 117.8, 113.9, 113.8, 106.5, 70.7, 70.6, 70.5, 70.4, 69.5, 68.0, 35.2, 30.3, 30.1; HR-MS(EI): calcd. for  $\text{C}_{26}\text{H}_{32}\text{O}_7\text{S}_8$ : 711.9914; found: 711.9921.

**Dyad 1** A solution of **10** (0.5 g, 0.81 mmol) in THF (60 mL) was treated with PPh<sub>3</sub> (0.43 g, 1.62 mmol) and H<sub>2</sub>O (0.2 mL, 11.1 mmol) at 25°C under N<sub>2</sub>. The resulting reaction mixture was warmed at 45°C for 10 h. The reaction mixture was diluted with water and extracted with CH<sub>2</sub>Cl<sub>2</sub>. The organic phase was dried over MgSO<sub>4</sub> and concentrated in vacuo to give crude **11** as a yellow oil that was used directly without further purification.. The crude product of **11** was dissolved in dry THF and the solution was cooled to 0 °C. tetrachloro-1,4-benzoquinone (0.37 g, 1.5 mmol) was added. After being stirred for 30 min at this temperature the reaction mixture was concentrated in vacuo. Column chromatography of the residue on silica gel with CH<sub>2</sub>Cl<sub>2</sub>/ EtOAc (6:1, v/v) as eluant afforded dyad **1** as a purple oil (0.20 g) in 31% yield: <sup>1</sup>H-NMR (400 MHz, CDCl<sub>3</sub>): δ 6.42 (1H, s), 4.00 (2H, m), 3.71 (2H, t, *J* = 5.1 Hz), 3.66-3.62 (18H, m), 3.29 (4H, s), 2.93 (2H, t, *J* = 6.4 Hz); <sup>13</sup>C NMR (100 MHz, CDCl<sub>3</sub>): δ 174.3, 170.0, 143.6, 142.8, 135.9, 126.8, 123.1, 114.1, 106.9, 70.9, 70.8, 70.77, 70.74, 70.67, 69.8, 69.7, 44.9, 35.5, 30.4; HR-MS (MALDI-TOF) calcd. for C<sub>26</sub>H<sub>30</sub>Cl<sub>3</sub>NO<sub>7</sub>S<sub>7</sub>:796.9133; found: 796.9092.

**Dyad 4** To a solution of **6** (0.59 g, 1.0 mmol) in dry THF was added petroleum ether rinsed NaH (52%, 0.23 g, 5.0 mmol) in N<sub>2</sub> atmosphere at room temperature. The mixture was stirred for 20 min whereupon 2,3-dichloro-1,4-nathphoquinone (0.45 g, 2.0 mmol) was added. After being heated to reflux for 6 h the reaction mixture was cooled to room temperature and filtered. The filtrate was concentrated in vacuo. After column chromatography (CH<sub>2</sub>Cl<sub>2</sub>/EtOAc, 5: 1) on silica gel, **4** was obtained as a yellow oil (0.38 g) in 48 % yield. <sup>1</sup>H NMR (400 MHz, CDCl<sub>3</sub>): δ 8.13 (1H, m), 8.07 (1H, m), 7.73 (2H, m), 6.42 (1H, s), 4.75 (2H, t, *J* = 4.4 Hz), 3.82 (2H, t, *J* = 4.4 Hz), 3.67-3.61 (12H, m), 3.55-3.49 (6H, m), 3.28 (4H, s), 2.92 (2H, t, *J* = 6.0 Hz); <sup>13</sup>C NMR (100 MHz, CDCl<sub>3</sub>): δ

179.5, 178.5, 157.0, 134.1, 133.8, 131.0, 130.8, 128.8, 126.8, 126.7, 126.5, 122.8, 117.6, 113.8, 113.7, 106.5, 73.2, 70.8, 70.7, 70.54, 70.47, 70.41, 69.5, 35.2, 30.1. HR-MS(EI): calcd. for  $C_{30}H_{33}ClO_8S_7$ : 779.9909; found: 779.9921.

**Compound 12** This was prepared in a similar manner as for dyad **1** from 1-Hexylamine as a purple solid in 46 % yield.  $^1H$  NMR (400 MHz,  $CDCl_3$ ):  $\delta$  5.93 (1H, s), 3.80 (2H, m), 1.66 (2H, m), 1.40-1.26 (6H, m), 0.90 (3H, t,  $J = 6.8$  Hz);  $^{13}C$  NMR (100 MHz,  $CDCl_3$ ):  $\delta$  174.5, 170.1, 154.2, 144.0, 142.4, 135.7, 45.4, 31.4, 30.9, 26.3, 22.6, 14.2; MS(EI):  $m/z$  309 ( $M^+$ ); HR-MS(EI): calcd. for  $C_{12}H_{14}NO_2Cl_3$ : 309.0090, 311.0061; found: 309.0086, 309.0056.

**Compound 15** This was prepared in a similar manner as for dyad **4** from triethylene glycol monomethyl ether as a pale yellow oil in 53 % yield.  $^1H$  NMR (400 MHz,  $CDCl_3$ ):  $\delta$  8.15 (1H, m), 8.08 (1H, m), 7.75 (2H, m), 4.76 (2H, t,  $J = 4.5$  Hz), 3.83 (2H, t,  $J = 4.5$  Hz), 3.64 (2H, t,  $J = 4.8$  Hz), 3.50 (4H, m), 3.47 (2H, m), 3.34 (3H, m);  $^{13}C$  NMR (100 MHz,  $CDCl_3$ ):  $\delta$  179.2, 178.1, 156.8, 133.9, 133.6, 130.7, 130.6, 126.5, 73.0, 71.5, 70.6, 70.5, 70.2, 70.1, 58.6; HR-MS(EI): calcd. for  $C_{17}H_{19}ClO_6$ : 354.0870; found: 354.0875.

## 2. Absorption spectra of dyads 1, 2, 3, and 4 in the presence of metal ions

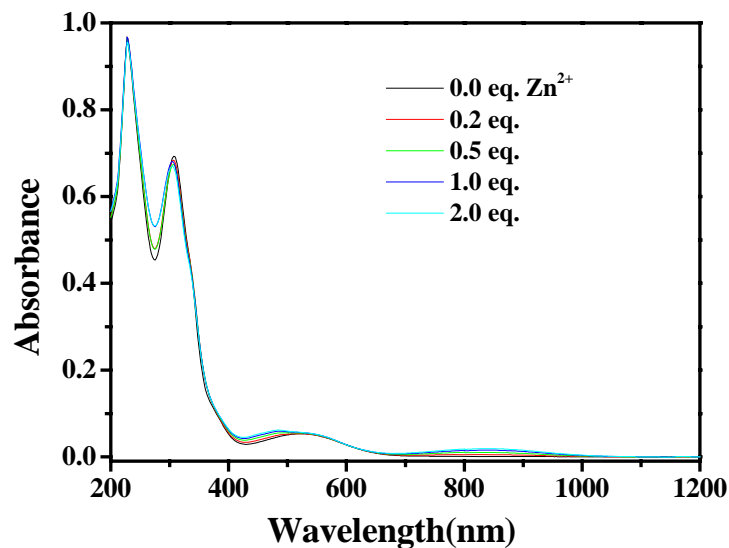

**Figure S1.** Absorption spectra of dyad **1** recorded in a mixture of CH<sub>2</sub>Cl<sub>2</sub> and CH<sub>3</sub>CN (1:1, v/v;  $5.0 \times 10^{-5}$  M) in the presence of increasing amount of Zn<sup>2+</sup> [Zn(ClO<sub>4</sub>)<sub>2</sub>].

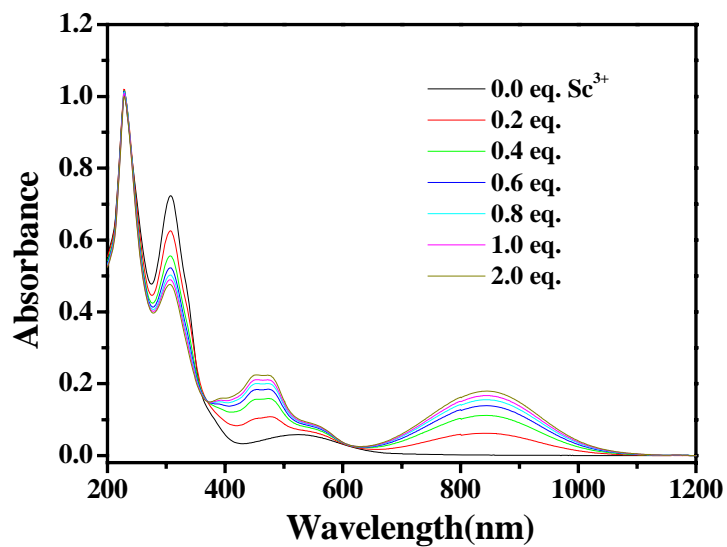

**Figure S2.** Absorption spectra of dyad **1** recorded in a mixture of CH<sub>2</sub>Cl<sub>2</sub> and CH<sub>3</sub>CN (1:1, v/v;  $5.0 \times 10^{-5}$  M) in the presence of increasing amount of Sc<sup>3+</sup> [Sc(SO<sub>3</sub>CF<sub>3</sub>)<sub>3</sub>].

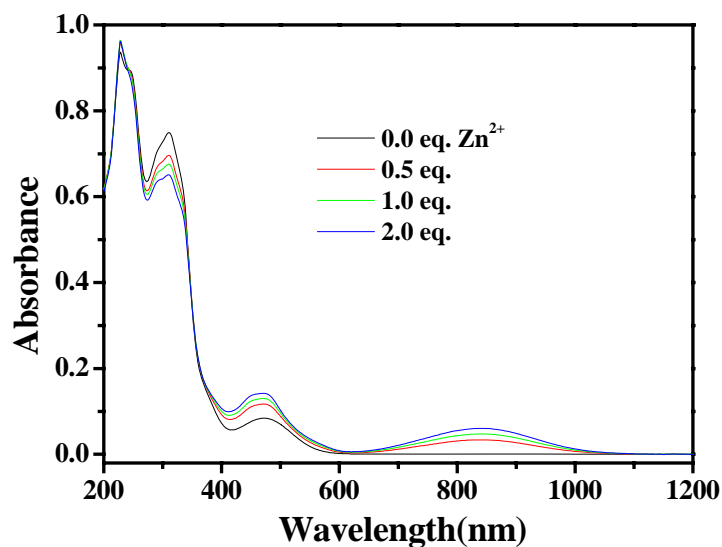

**Figure S3.** Absorption spectra of dyad **2** recorded in a mixture of CH<sub>2</sub>Cl<sub>2</sub> and CH<sub>3</sub>CN (1:1, v/v; 5.0 × 10<sup>-5</sup> M) in the presence of increasing amount of Zn<sup>2+</sup> [Zn(ClO<sub>4</sub>)<sub>2</sub>].

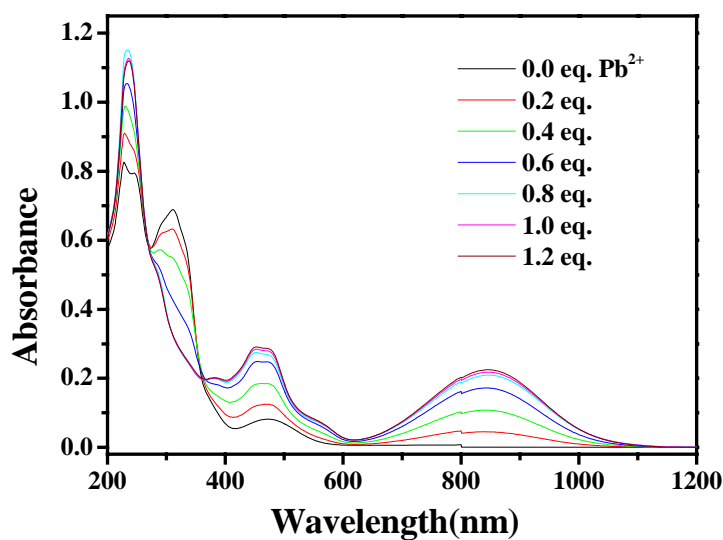

**Figure S4.** Absorption spectra of dyad **2** recorded in a mixture of CH<sub>2</sub>Cl<sub>2</sub> and CH<sub>3</sub>CN (1:1, v/v; 5.0 × 10<sup>-5</sup> M) in the presence of increasing amount of Pb<sup>2+</sup> [Pb(ClO<sub>4</sub>)<sub>2</sub>].

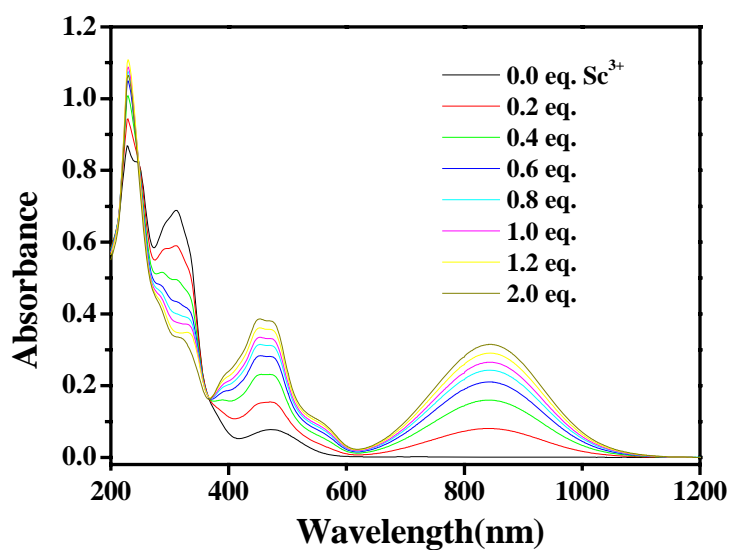

**Figure S5.** Absorption spectra of dyad **2** recorded in a mixture of CH<sub>2</sub>Cl<sub>2</sub> and CH<sub>3</sub>CN (1:1, v/v;  $5.0 \times 10^{-5}$  M) in the presence of increasing amount of Sc<sup>3+</sup> [Sc(SO<sub>3</sub>CF<sub>3</sub>)<sub>3</sub>].

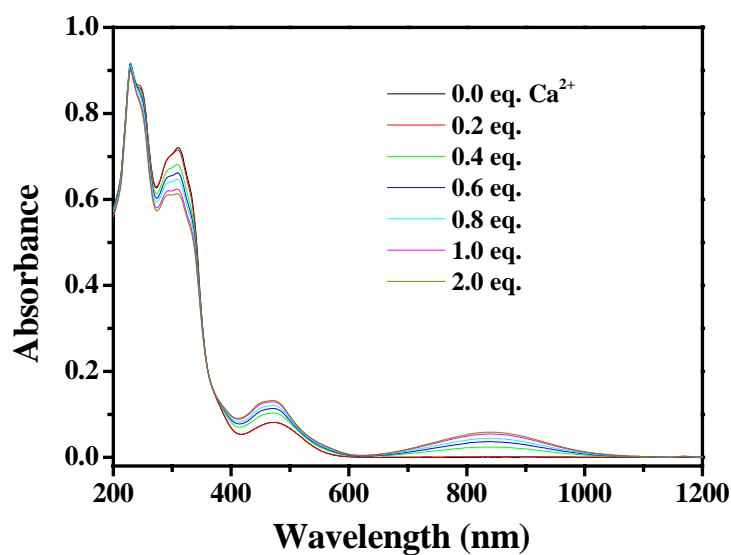

**Figure S6.** Absorption spectra of dyad **2** recorded in a mixture of CH<sub>2</sub>Cl<sub>2</sub> and CH<sub>3</sub>CN (1:1, v/v;  $5.0 \times 10^{-5}$  M) in the presence of increasing amount of Ca<sup>2+</sup> [Ca(ClO<sub>4</sub>)<sub>2</sub>].

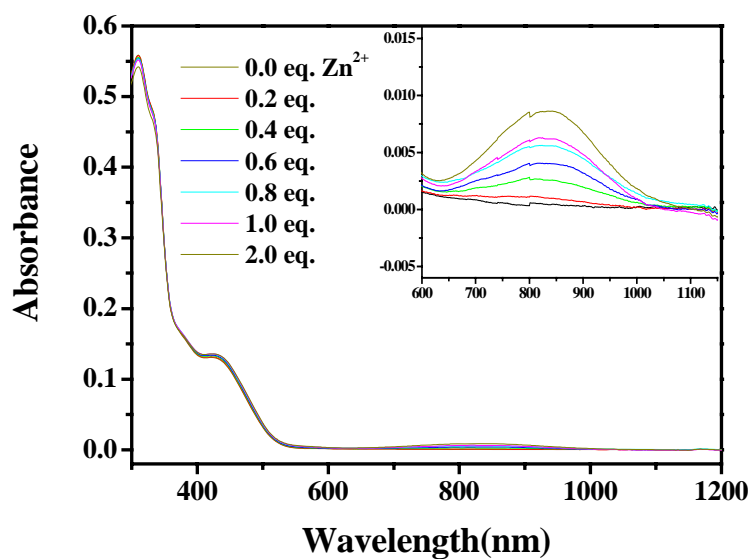

**Figure S7.** Absorption spectra of dyad **3** recorded in a mixture of CH<sub>2</sub>Cl<sub>2</sub> and CH<sub>3</sub>CN (1:1, v/v; 5.0 × 10<sup>-5</sup> M) in the presence of increasing amount of Zn<sup>2+</sup> [Zn(ClO<sub>4</sub>)<sub>2</sub>], inset is the enlargement of the 600-1150 nm region.

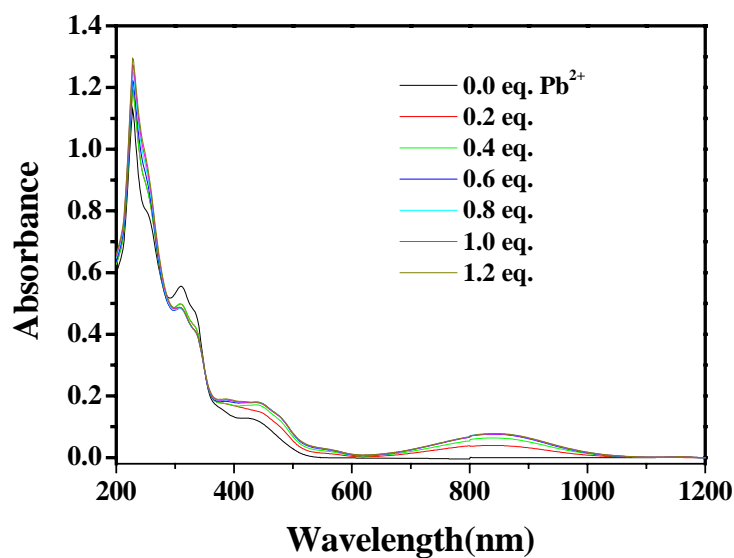

**Figure S8.** Absorption spectra of dyad **3** recorded in a mixture of CH<sub>2</sub>Cl<sub>2</sub> and CH<sub>3</sub>CN (1:1, v/v; 5.0 × 10<sup>-5</sup> M) in the presence of increasing amount of Pb<sup>2+</sup> [Pb(ClO<sub>4</sub>)<sub>2</sub>].

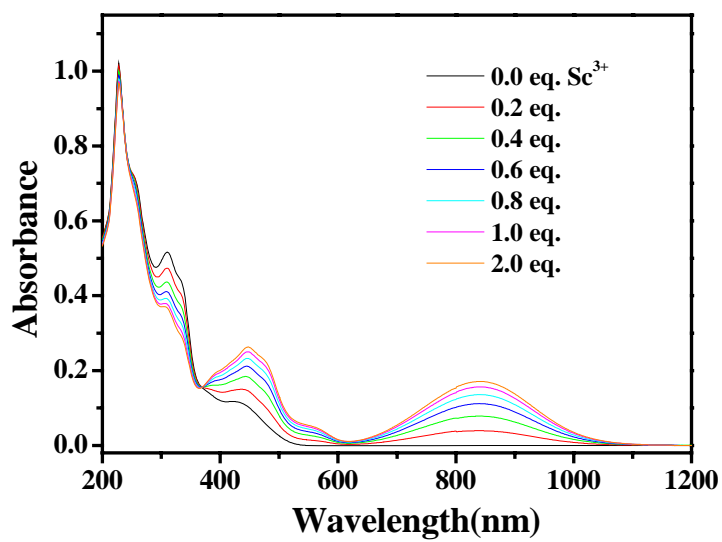

**Figure S9.** Absorption spectra of dyad **3** recorded in a mixture of  $\text{CH}_2\text{Cl}_2$  and  $\text{CH}_3\text{CN}$  (1:1, v/v;  $5.0 \times 10^{-5}$  M) in the presence of increasing amount of  $\text{Sc}^{3+}$  [ $\text{Sc}(\text{SO}_3\text{CF}_3)_3$ ].

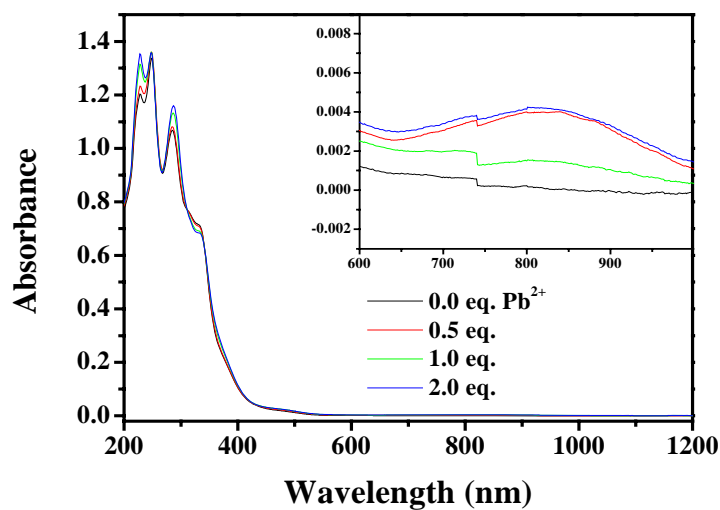

**Figure S10.** Absorption spectra of dyad **4** recorded in a mixture of  $\text{CH}_2\text{Cl}_2$  and  $\text{CH}_3\text{CN}$  (1:1, v/v;  $5.0 \times 10^{-5}$  M) in the presence of increasing amount of  $\text{Pb}^{2+}$  [ $\text{Pb}(\text{ClO}_4)_2$ ], inset is the enlargement of the 600-1000 nm region.

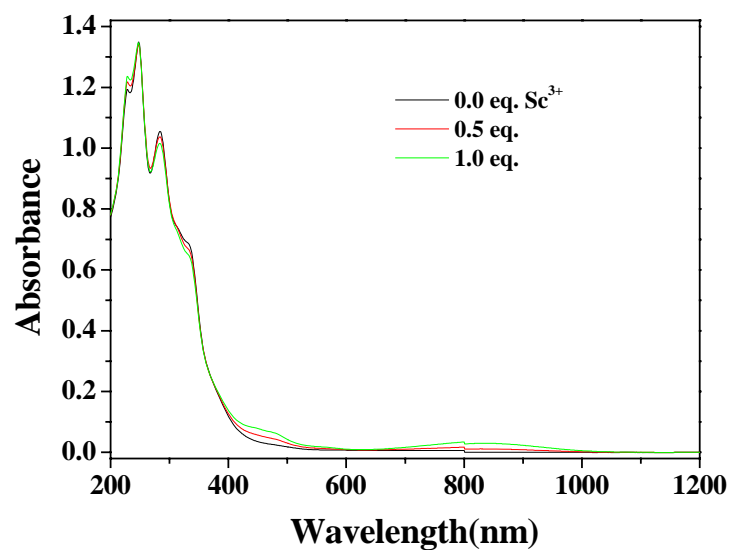

**Figure S11.** Absorption spectra of dyad **4** recorded in a mixture of  $\text{CH}_2\text{Cl}_2$  and  $\text{CH}_3\text{CN}$  (1:1, v/v;  $5.0 \times 10^{-5}$  M) in the presence of increasing amount of  $\text{Sc}^{3+}$  [ $\text{Sc}(\text{SO}_3\text{CF}_3)_3$ ].

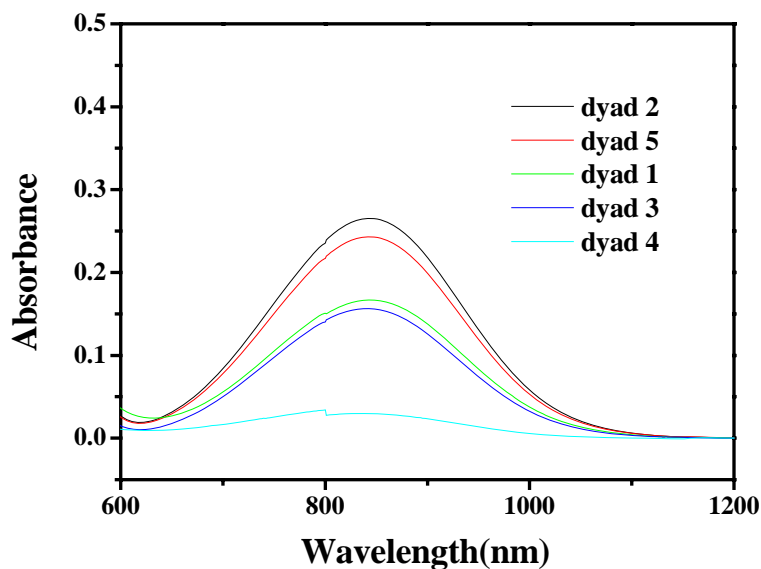

**Figure S12.** Absorption spectra of the 600-1200 nm region of dyads **1**, **2**, **3**, **4**, and **5** in the presence of 1.0 eq. of  $\text{Sc}^{3+}$  [ $\text{Sc}(\text{SO}_3\text{CF}_3)_3$ ].

**3. Absorption spectra of 6 after chemical and electrochemical oxidations as well as those of 6, 12 and the mixture of 6 and 12**

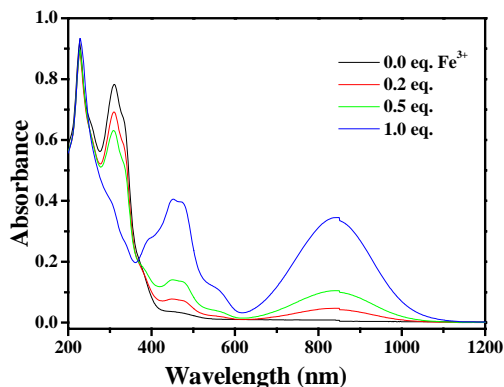

**Figure S13.** Absorption spectra of compound **6** recorded in a mixture of CH<sub>2</sub>Cl<sub>2</sub> and CH<sub>3</sub>CN (1:1, v/v; 5.0 × 10<sup>-5</sup> M) in the presence of increasing amount of Fe<sup>3+</sup> [Fe(ClO<sub>4</sub>)<sub>3</sub>].

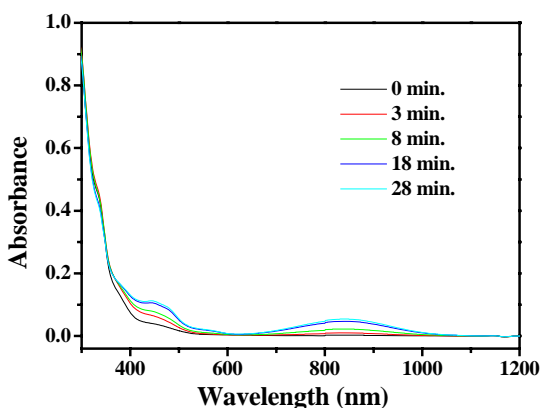

**Figure S14.** Absorption spectra of compound **6** recorded in a mixture of CH<sub>2</sub>Cl<sub>2</sub> and CH<sub>3</sub>CN (1:1, v/v; 5.0 × 10<sup>-5</sup> M) containing *n*-Bu<sub>4</sub>NPF<sub>6</sub> (27.8 mM) after applying an oxidation potential of 0.65 V (vs. Ag/AgCl).

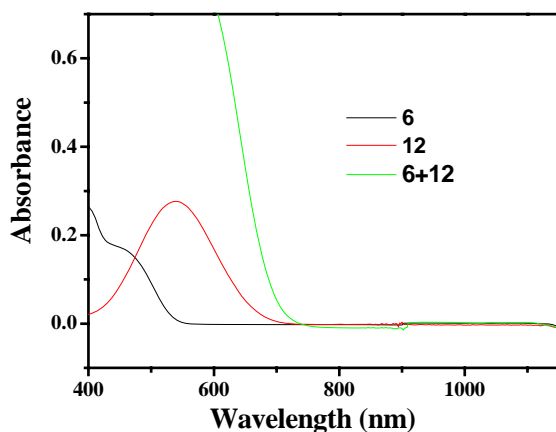

**Figure S15.** Absorption spectra of compound **6** (1.5 × 10<sup>-3</sup> M), **12** (2.5 × 10<sup>-3</sup> M) and the mixture of **6** (1.5 × 10<sup>-2</sup> M) and **12** (2.5 × 10<sup>-2</sup> M) recorded in CH<sub>2</sub>Cl<sub>2</sub>/CH<sub>3</sub>CN (1:1, v/v).

**4. ESR spectra of dyads 2, 3, 4, and 5 in the presence of metal ions.**

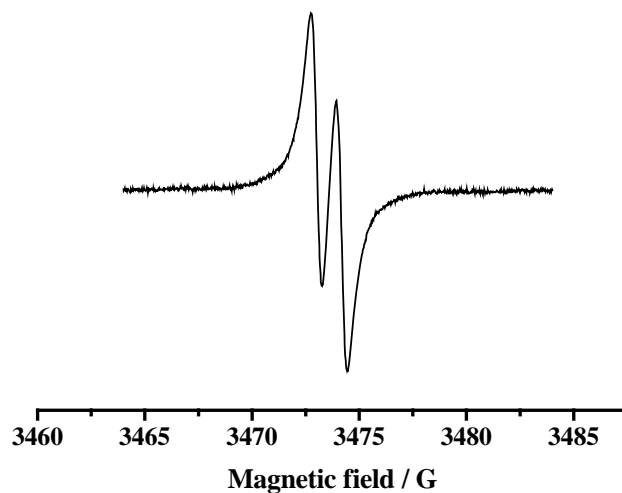

**Figure S16.** ESR spectrum of dyad **2** ( $1.0 \times 10^{-4}$  M) in  $\text{CH}_2\text{Cl}_2/\text{CH}_3\text{CN}$  (1:1, v/v) in the presence of 1.0 equiv of  $\text{Pb}^{2+}$  [ $\text{Pb}(\text{ClO}_4)_2$ ] recorded at room temperature; the solution was degassed before measurement.

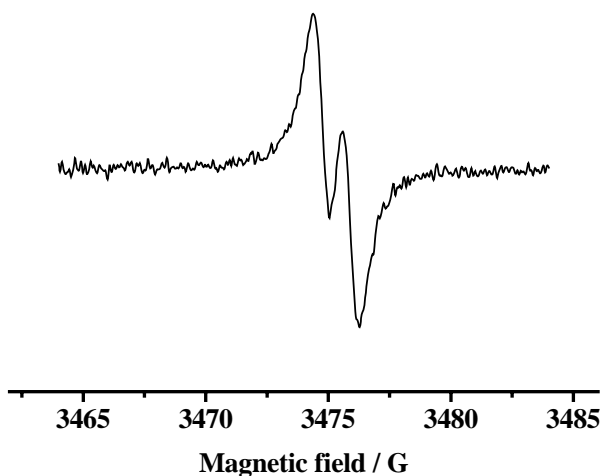

**Figure S17.** ESR spectrum of dyad **3** ( $1.0 \times 10^{-4}$  M) in  $\text{CH}_2\text{Cl}_2/\text{CH}_3\text{CN}$  (1:1, v/v) in the presence of 1.0 equiv of  $\text{Pb}^{2+}$  [ $\text{Pb}(\text{ClO}_4)_2$ ] recorded at room temperature; the solution was degassed before measurement.

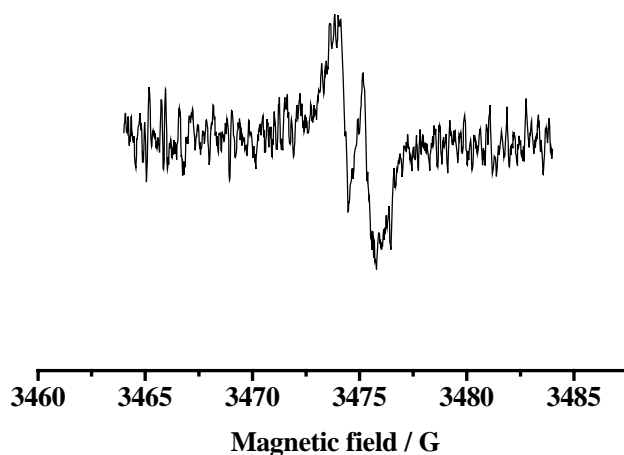

**Figure S18.** ESR spectrum of dyad **4** ( $1.0 \times 10^{-4}$  M) in  $\text{CH}_2\text{Cl}_2/\text{CH}_3\text{CN}$  (1:1, v/v) in the presence of 1.0 equiv of  $\text{Pb}^{2+}$  [ $\text{Pb}(\text{ClO}_4)_2$ ] recorded at room temperature; the solution was degassed before measurement.

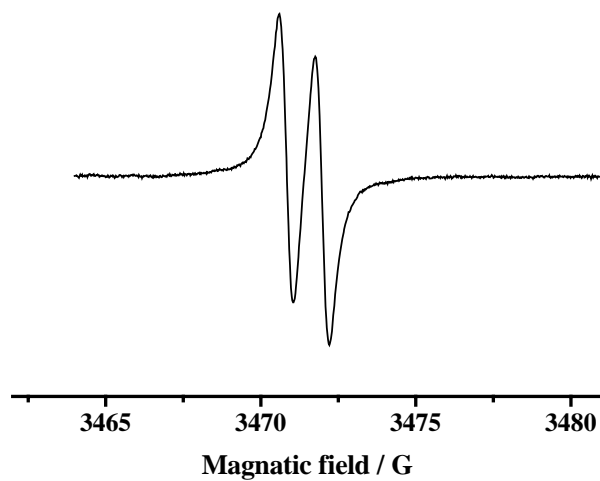

**Figure S19.** ESR spectrum of dyad **5** ( $1.0 \times 10^{-4}$  M) in  $\text{CH}_2\text{Cl}_2/\text{CH}_3\text{CN}$  (1:1, v/v) in the presence of 1.0 equiv of  $\text{Pb}^{2+}$  [ $\text{Pb}(\text{ClO}_4)_2$ ] recorded at room temperature; the solution was degassed before measurement.

5. Cyclic voltammograms of 1, 2, 3, and 4, and compounds 12-15 and those in the presence of metal ions.

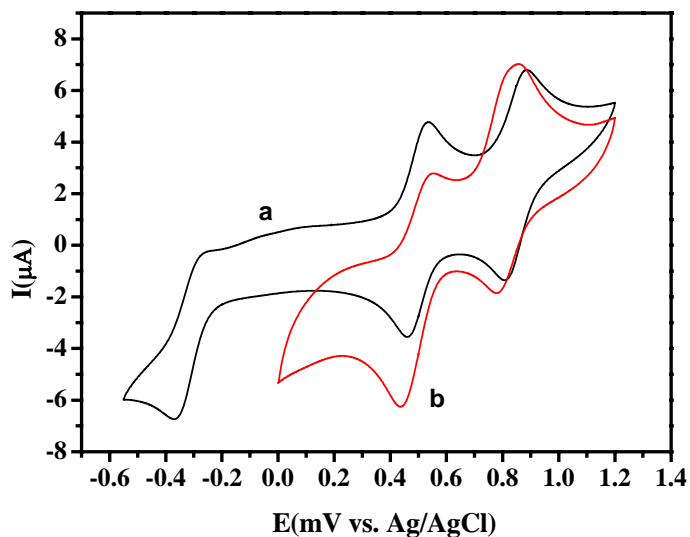

**Figure S20.** Cyclic voltammograms of dyad **1** ( $5.0 \times 10^{-4}$  M) (a, black) before and (b, red) after addition of 1.2 equiv of  $\text{Sc}^{3+}$  in a mixture of  $\text{CH}_2\text{Cl}_2$  and  $\text{CH}_3\text{CN}$  at a scan rate of  $100 \text{ mV S}^{-1}$ .

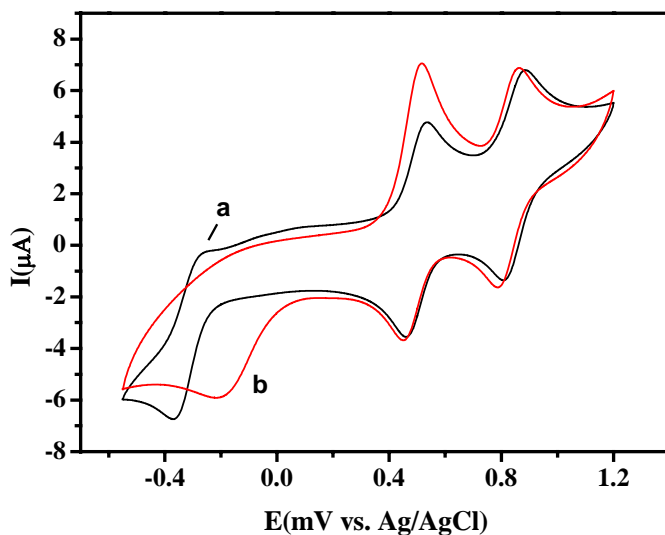

**Figure S21.** Cyclic voltammograms of dyad **1** ( $5.0 \times 10^{-4}$  M) (a, black) before and (b, red) after addition of 2 equiv of  $\text{Zn}^{2+}$  in a mixture of  $\text{CH}_2\text{Cl}_2$  and  $\text{CH}_3\text{CN}$  at a scan rate of  $100 \text{ mV S}^{-1}$ .

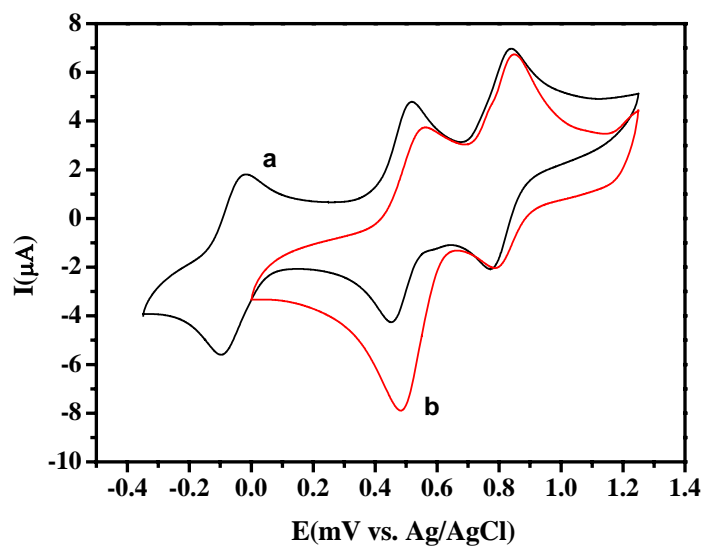

**Figure S22.** Cyclic voltammograms of dyad **2** ( $5.0 \times 10^{-4}$  M) (a, black) before and (b, red) after addition of 2 equiv of  $\text{Pb}^{2+}$  in a mixture of  $\text{CH}_2\text{Cl}_2$  and  $\text{CH}_3\text{CN}$  at a scan rate of  $100 \text{ mV S}^{-1}$ .

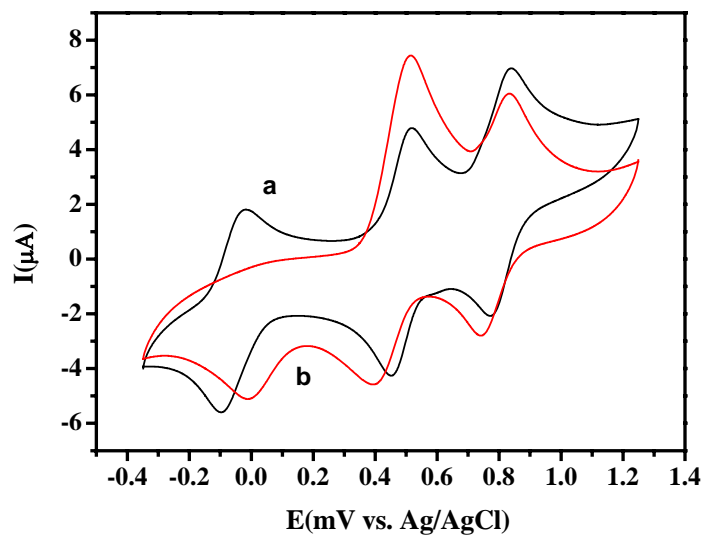

**Figure S23.** Cyclic voltammograms of dyad **2** ( $5.0 \times 10^{-4}$  M) (a, black) before and (b, red) after addition of 4 equiv of  $\text{Zn}^{2+}$  in a mixture of  $\text{CH}_2\text{Cl}_2$  and  $\text{CH}_3\text{CN}$  at a scan rate of  $100 \text{ mV S}^{-1}$ .

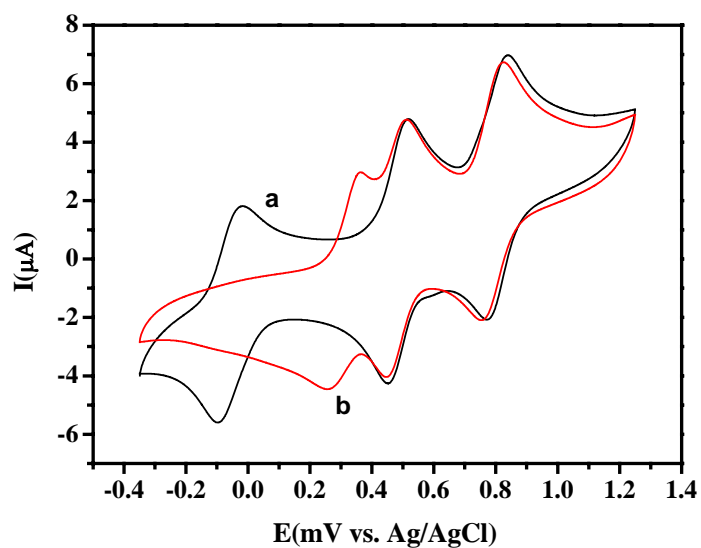

**Figure S24.** Cyclic voltammograms of dyad **2** ( $5.0 \times 10^{-4}$  M) (a, black) before and (b, red) after addition of 4 equiv of  $\text{Ca}^{2+}$  in a mixture of  $\text{CH}_2\text{Cl}_2$  and  $\text{CH}_3\text{CN}$  at a scan rate of  $100 \text{ mV S}^{-1}$ .

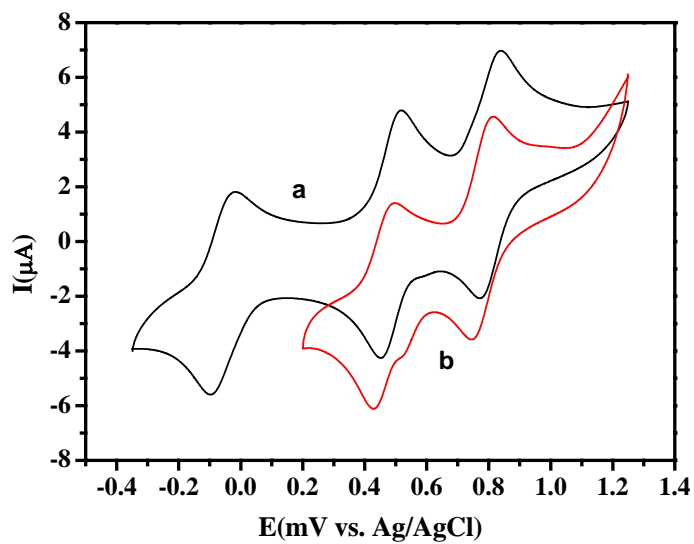

**Figure S25.** Cyclic voltammograms of dyad **2** ( $5.0 \times 10^{-4}$  M) (a, black) before and (b, red) after addition of 2 equiv of  $\text{Sc}^{3+}$  in a mixture of  $\text{CH}_2\text{Cl}_2$  and  $\text{CH}_3\text{CN}$  at a scan rate of  $100 \text{ mV S}^{-1}$ .

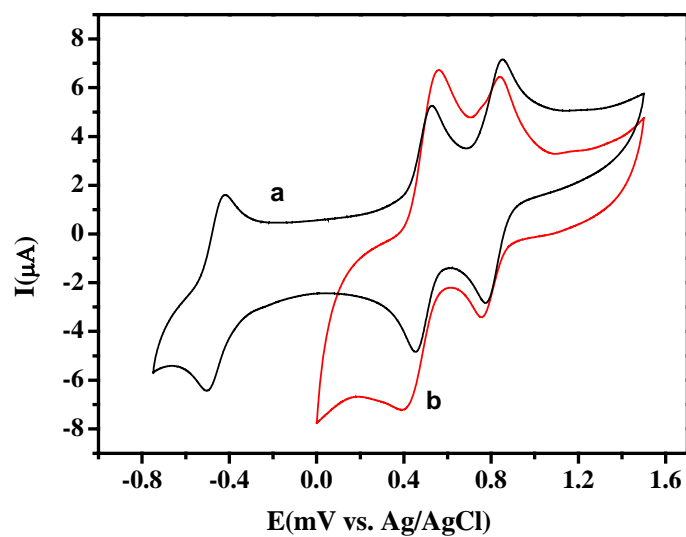

**Figure S26.** Cyclic voltammograms of dyad **3** ( $5.0 \times 10^{-4}$  M) (a, black) before and (b, red) after addition of 2 equiv of Pb<sup>2+</sup> in a mixture of CH<sub>2</sub>Cl<sub>2</sub> and CH<sub>3</sub>CN at a scan rate of 100 mV S<sup>-1</sup>.

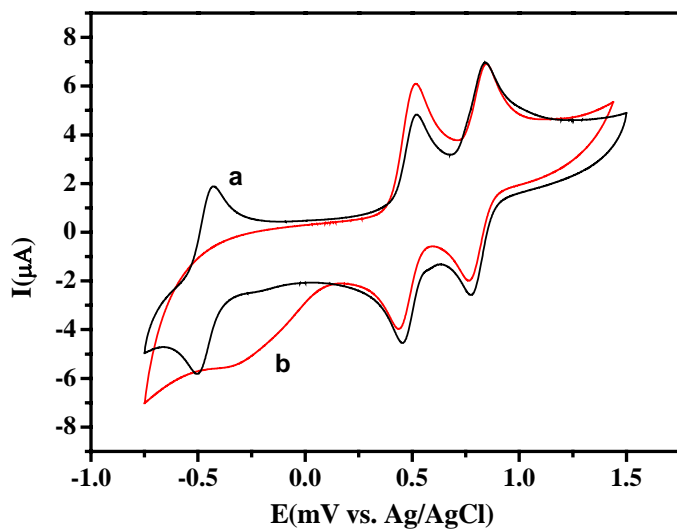

**Figure S27.** Cyclic voltammograms of dyad **3** ( $5.0 \times 10^{-4}$  M) (a, black) before and (b, red) after addition of 2 equiv of Zn<sup>2+</sup> in a mixture of CH<sub>2</sub>Cl<sub>2</sub> and CH<sub>3</sub>CN at a scan rate of 100 mV S<sup>-1</sup>.

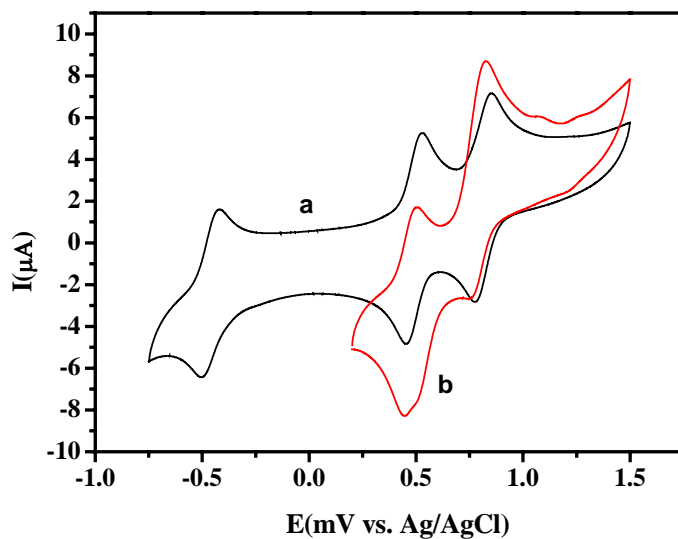

**Figure S28.** Cyclic voltammograms of dyad **3** ( $5.0 \times 10^{-4}$  M) (a, black) before and (b, red) after addition of 2 equiv of  $\text{Sc}^{3+}$  in a mixture of  $\text{CH}_2\text{Cl}_2$  and  $\text{CH}_3\text{CN}$  at a scan rate of  $100 \text{ mV S}^{-1}$ .

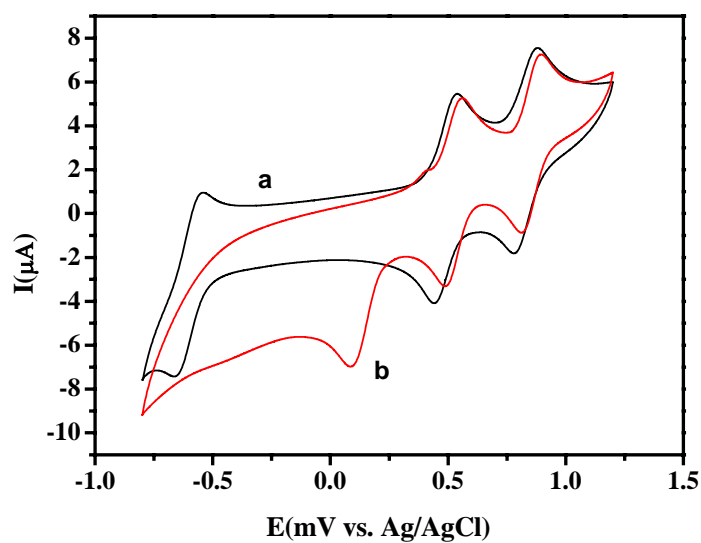

**Figure S29.** Cyclic voltammograms of dyad **4** ( $5.0 \times 10^{-4}$  M) (a, black) before and (b, red) after addition of 1.2 equiv of  $\text{Pb}^{2+}$  in a mixture of  $\text{CH}_2\text{Cl}_2$  and  $\text{CH}_3\text{CN}$  at a scan rate of  $100 \text{ mV S}^{-1}$ .

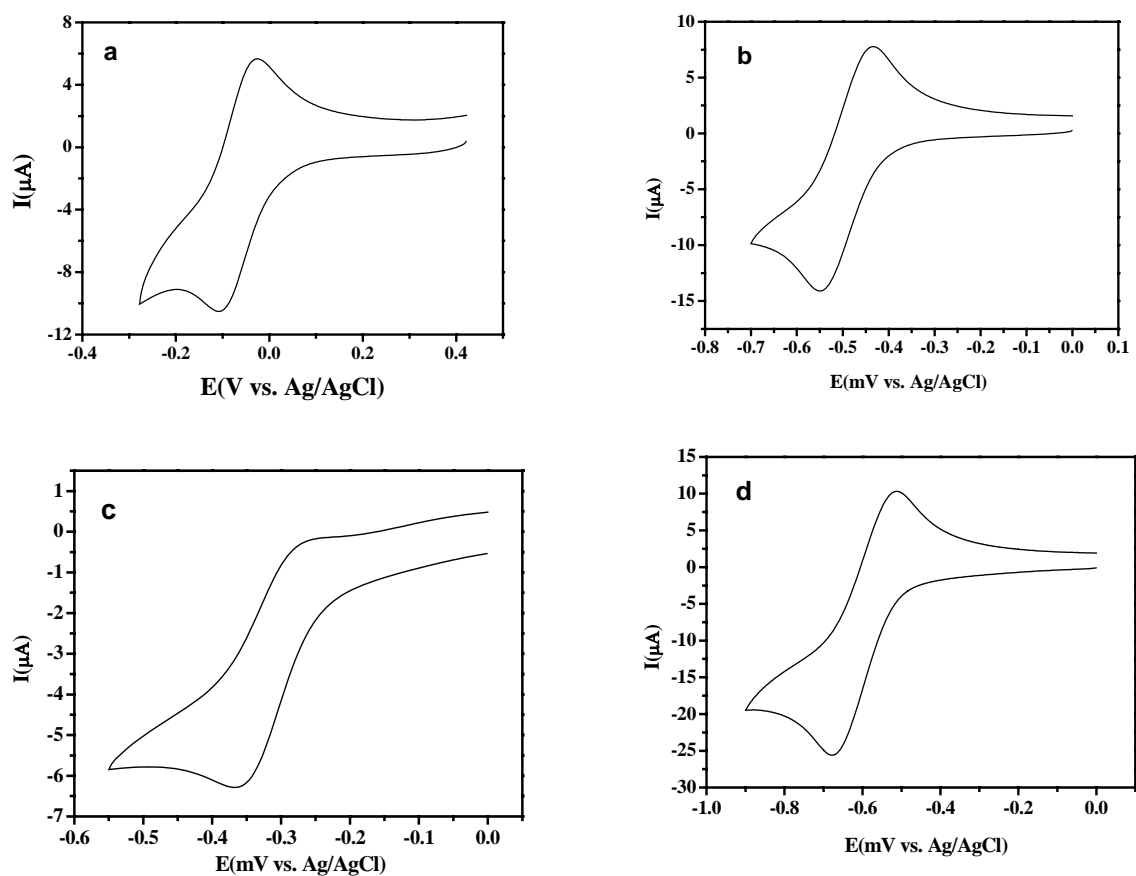

**Figure S30.** Cyclic voltammograms of compounds **13** ( $5.0 \times 10^{-4}$  M) (a), **14** ( $5.0 \times 10^{-4}$  M) (b) **12** ( $5.0 \times 10^{-4}$  M) (c), and **15** ( $1.0 \times 10^{-3}$  M) (d) in a mixture of  $\text{CH}_2\text{Cl}_2$  and  $\text{CH}_3\text{CN}$  at a scan rate of  $100 \text{ mV S}^{-1}$ .

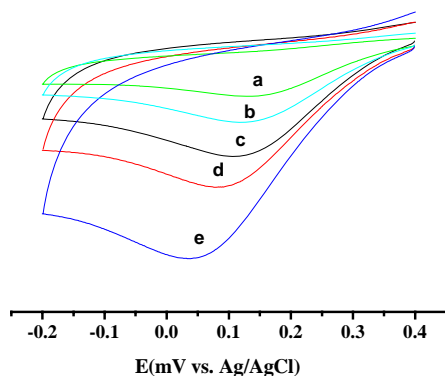

**Figure S31.** Cathodic waves of compound **12** in a mixture of  $\text{CH}_2\text{Cl}_2$  and  $\text{CH}_3\text{CN}$  (1:1, v/v;  $5.0 \times 10^{-4}$  M) in the presence of 4.0 equiv of  $\text{Pb}(\text{ClO}_4)_2$  at various sweep rates: (a) 10, (b) 50, (c) 100, (d) 200, (e)  $300 \text{ mV s}^{-1}$

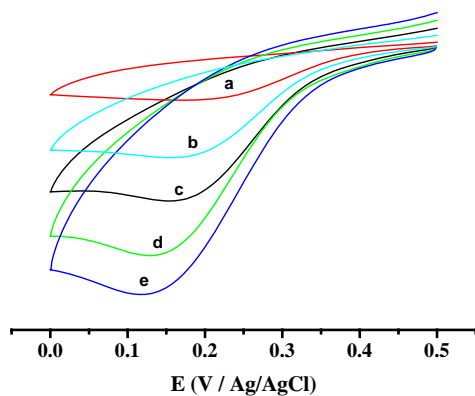

**Figure S32.** Cathodic waves of compound **13** in a mixture of  $\text{CH}_2\text{Cl}_2$  and  $\text{CH}_3\text{CN}$  (1:1, v/v;  $5.0 \times 10^{-4}$  M) in the presence of 4.0 equiv of  $\text{Pb}(\text{ClO}_4)_2$  at various sweep rates: (a) 10, (b) 50, (c) 100, (d) 200, (e) 300  $\text{mV s}^{-1}$

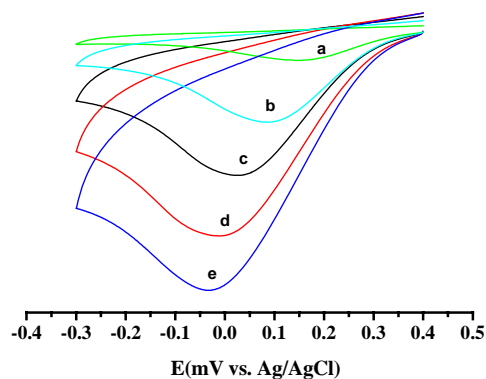

**Figure S33.** Cathodic waves of compound **14** in a mixture of  $\text{CH}_2\text{Cl}_2$  and  $\text{CH}_3\text{CN}$  (1:1, v/v;  $5.0 \times 10^{-4}$  M) in the presence of 2.0 equiv of  $\text{Pb}(\text{ClO}_4)_2$  at various sweep rates: (a) 10, (b) 50, (c) 100, (d) 200, (e) 300  $\text{mV s}^{-1}$

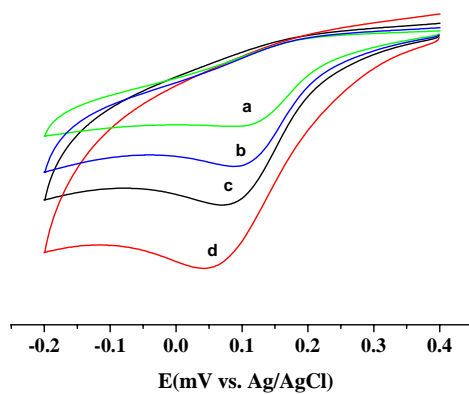

**Figure S34.** Cathodic waves of compound **15** in a mixture of  $\text{CH}_2\text{Cl}_2$  and  $\text{CH}_3\text{CN}$  (1:1, v/v;  $5.0 \times 10^{-4}$  M) in the presence of 4.0 equiv of  $\text{Pb}(\text{ClO}_4)_2$  at various sweep rates: (a) 10, (b) 50, (c) 100, (d) 200  $\text{mV s}^{-1}$

According to previous report (*J. Chem.. Soc. Perkin Trans. II*, **1985**, 371-378 and *Bull. Chem. Soc. Jpn.* **1983**, 56, 2220-2227), the width of the cathodic wave ( $E_{\text{red}}^{\text{p}/2} - E_{\text{red}}^{\text{p}}$ ) in such an irreversible system is known to depend on the transfer coefficient  $\beta$  according to equation (1), where  $F$  is the faraday constant and the other notations are conventional.

$$E_{\text{red}}^{\text{p}/2} - E_{\text{red}}^{\text{p}} = 1.857 RT / \beta F \dots\dots\dots(1)$$

According to equation (2), the reduction potential  $E_{\text{red}}^0$  can be evaluated from the intercept of the linear correlation between  $E_{\text{red}}^{\text{p}}$  and  $4(1 - 2\beta)$ .  $\beta$  value is obtained from the cyclic voltammogram by using equation (1).

$$E_{\text{red}}^{\text{p}} = E_{\text{red}}^0 - 4(1 - 2\beta) \Delta G_0^\ddagger / F \dots\dots\dots(2)$$

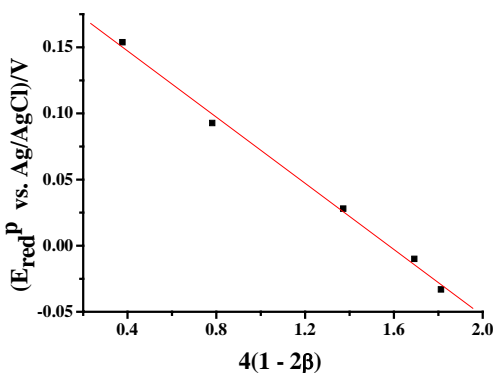

**Figure S35.** The plot of the cathodic-peak potentials  $E_{\text{red}}^{\text{p}}$  (vs. Ag/AgCl) of compound **12** ( $5.0 \times 10^{-3}$  M) in the presence of 2.0 equiv of  $\text{Pb}(\text{ClO}_4)_2$  vs.  $4(1-2\beta)$ ; the reduction potential of compound **14** in the presence of  $\text{Pb}^{2+}$  was estimated to be 0.22 V.

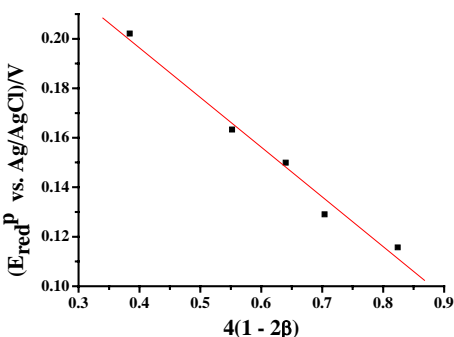

**Figure S36.** The plot of the cathodic-peak potentials  $E_{\text{red}}^{\text{p}}$  (vs. Ag/AgCl) of compound **13** ( $5.0 \times 10^{-3}$  M) in the presence of 4.0 equiv of  $\text{Pb}(\text{ClO}_4)_2$  vs.  $4(1-2\beta)$ ; the reduction potential of compound **13** in the presence of  $\text{Pb}^{2+}$  was estimated to be 0.28 V.

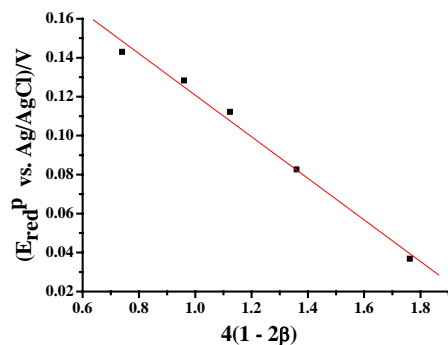

**Figure S37.** The plot of the cathodic-peak potentials  $E_{red}^P$  (vs. Ag/AgCl) of compound **14** ( $5.0 \times 10^{-3}$  M) in the presence of 2.0 equiv of  $Pb(ClO_4)_2$  vs.  $4(1-2\beta)$ ; the reduction potential of compound **13** in the presence of  $Pb^{2+}$  was estimated to be 0.19 V.

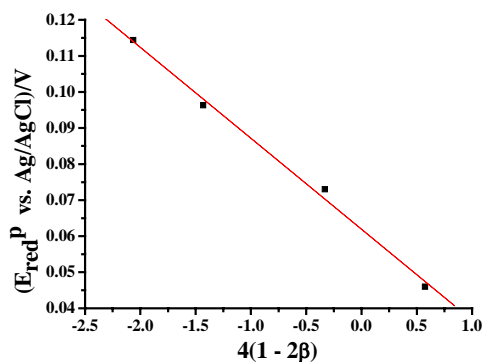

**Figure S38.** The plot of the cathodic-peak potentials  $E_{red}^P$  (vs. Ag/AgCl) of compound **15** ( $5.0 \times 10^{-3}$  M) in the presence of 2.0 equiv of  $Pb(ClO_4)_2$  vs.  $4(1-2\beta)$ ; the reduction potential of compound **15** in the presence of  $Pb^{2+}$  was estimated to be 0.06 V.

6. The  $^1\text{H}$  NMR and  $^{13}\text{C}$  NMR of dyads 1, 2, 3, and 4, and compounds 7, 8, 10, 12, and 15.

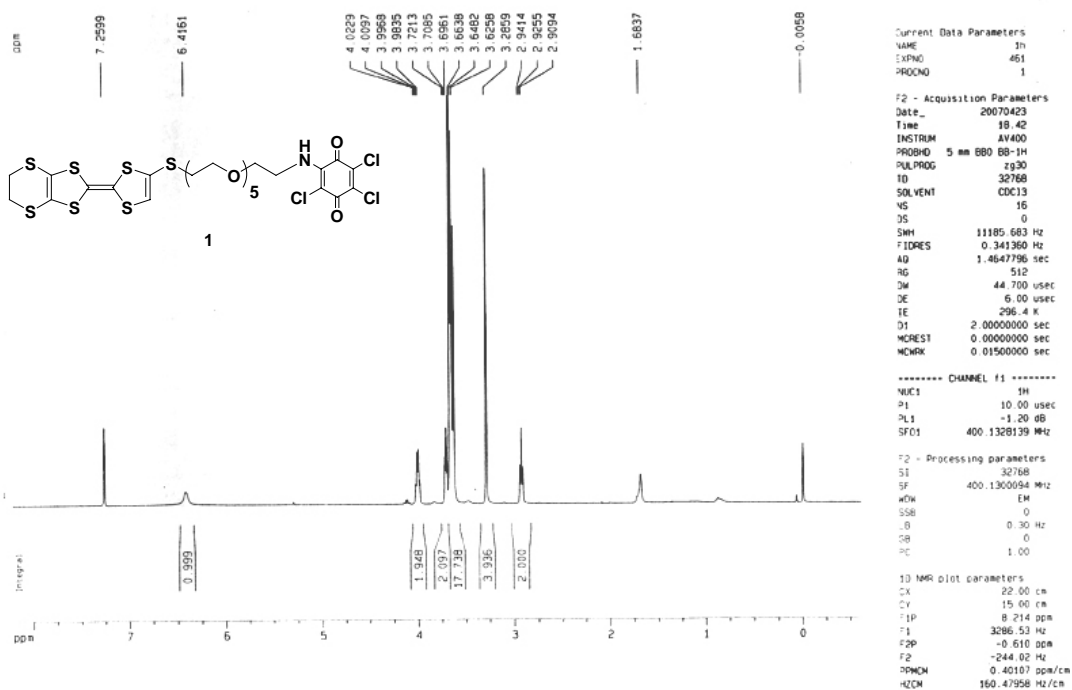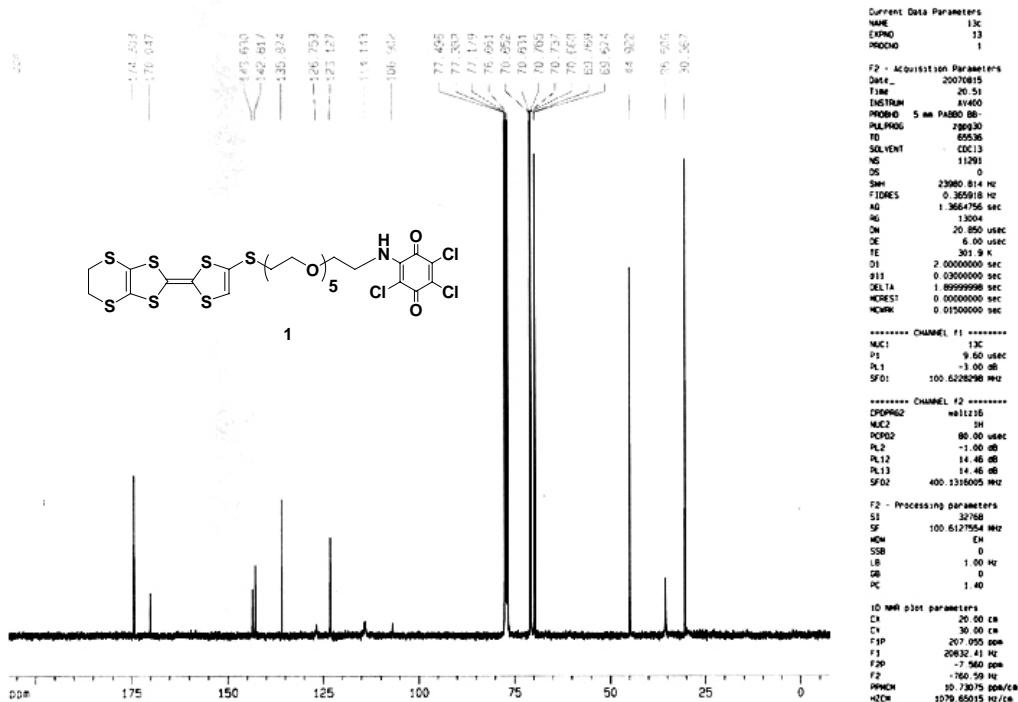

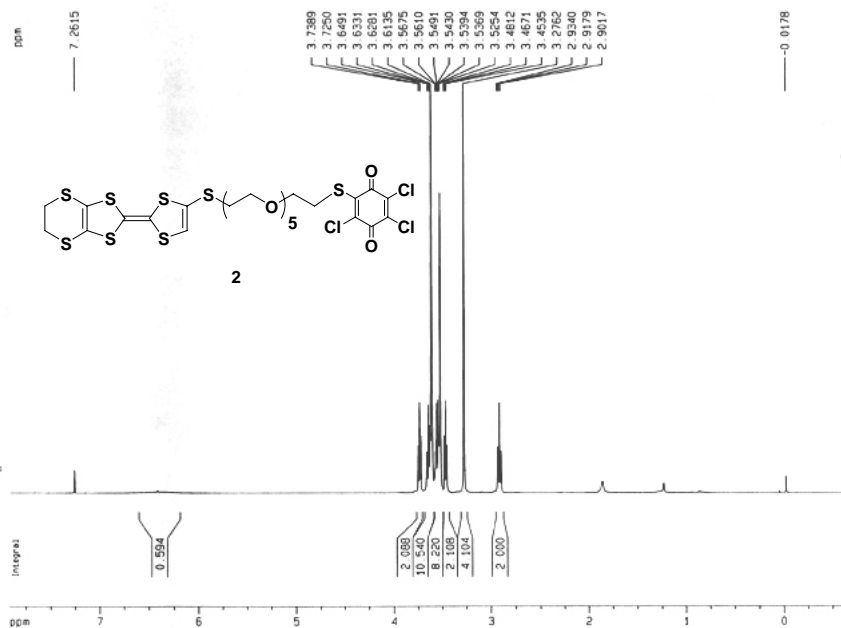

Current Data Parameters  
 NAME 1h  
 EXPNO 504  
 PROCNO 1

F2 - Acquisition Parameters  
 Date\_ 20070602  
 Time 19.10  
 INSTRUM AV400  
 PROBHD 5 mm BBO BB-1H  
 PULPROG zg30  
 TD 32768  
 SOLVENT CDCl3  
 NS 8  
 DS 0  
 SWH 11185.683 Hz  
 FIDRES 0.341360 Hz  
 AQ 1.4647796 sec  
 RG 322.5  
 DW 44.700 usec  
 DE 6.00 usec  
 TE 673.2 K  
 D1 2.00000000 sec  
 MCREST 0.00000000 sec  
 MCWPR 0.01500000 sec

\*\*\*\*\* CHANNEL f1 \*\*\*\*\*  
 NUC1 1H  
 P1 10.00 usec  
 PL1 -1.20 dB  
 SFO1 400.1328139 MHz

F2 - Processing parameters  
 SI 32768  
 SF 400.1300087 MHz  
 WDW EN  
 SSB 0  
 LB 0.30 Hz  
 GB 0  
 PC 1.00

1D NMR plot parameters  
 CX 22.00 cm  
 CY 12.00 cm  
 F1P 7.915 ppm  
 F1 3166.99 Hz  
 F2P -0.652 ppm  
 F2 -261.06 Hz  
 PRMCH 0.38942 ppm/cm  
 HZCM 155.82845 Hz/cm

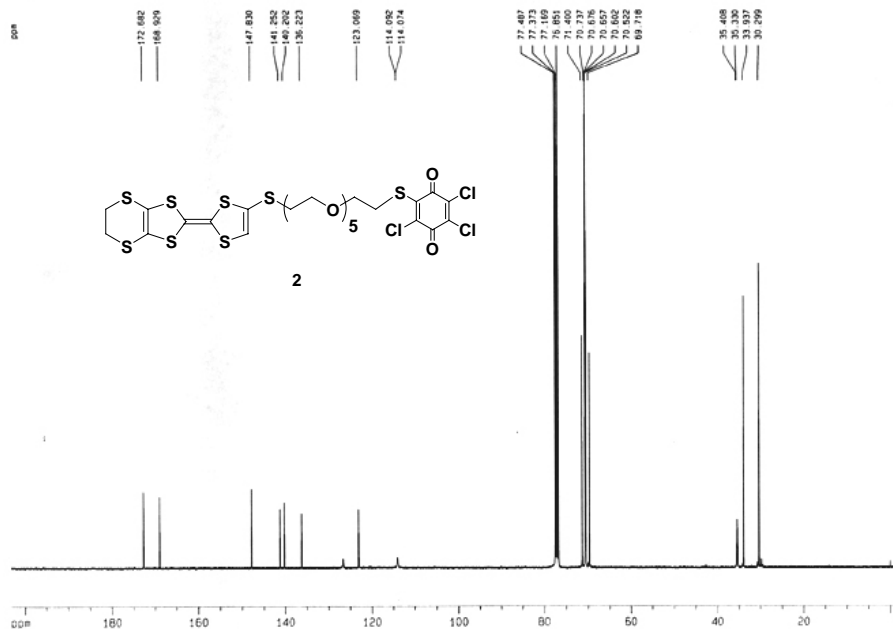

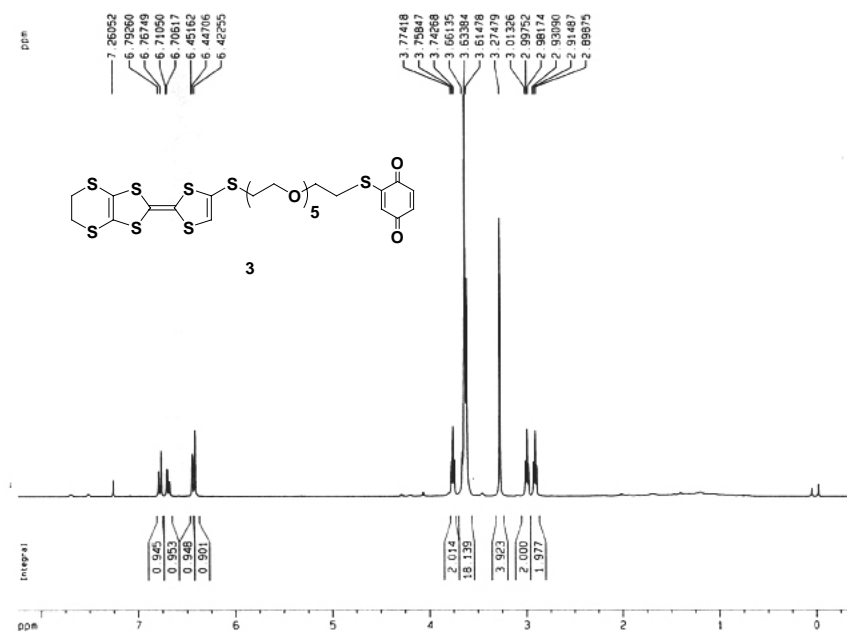

Current Data Parameters  
NAME 1H  
EXPNO 213  
PROCNO 1

F2 - Acquisition Parameters  
Date\_ 20060909  
Time 19.42  
INSTRUM AV400  
PROBHD 5 mm BBO BB-1H  
PULPROG zg30  
TD 32768  
SOLVENT CDCl3  
VS 8  
DS 0  
SWH 7183.908 Hz  
FIDRES 0.215235 Hz  
AQ 2.2807026 sec  
RG 90.5  
SW 69.600 usec  
DE 6.00 usec  
TE 298.4 K  
D1 2.00000000 sec  
MCHES1 0.00000000 sec  
MCHES2 0.01500000 sec

\*\*\*\*\* CHANNEL f1 \*\*\*\*\*  
NUC1 1H  
P1 10.00 usec  
PL1 -1.20 dB  
SFO1 400.1328104 MHz

F2 - Processing parameters  
SI 32768  
SF 400.1300099 MHz  
WDW EM  
SSB 0  
LB 0.30 Hz  
GB 0  
PC 1.00

1D NMR plot parameters  
CX 22.00 cm  
CY 20.00 cm  
FIDP 8.243 ppm  
F1 3298.15 Hz  
F2P -0.356 ppm  
F2 -142.64 Hz  
PMCH 0.39087 ppm/cm  
HZCM 156.39954 Hz/cm

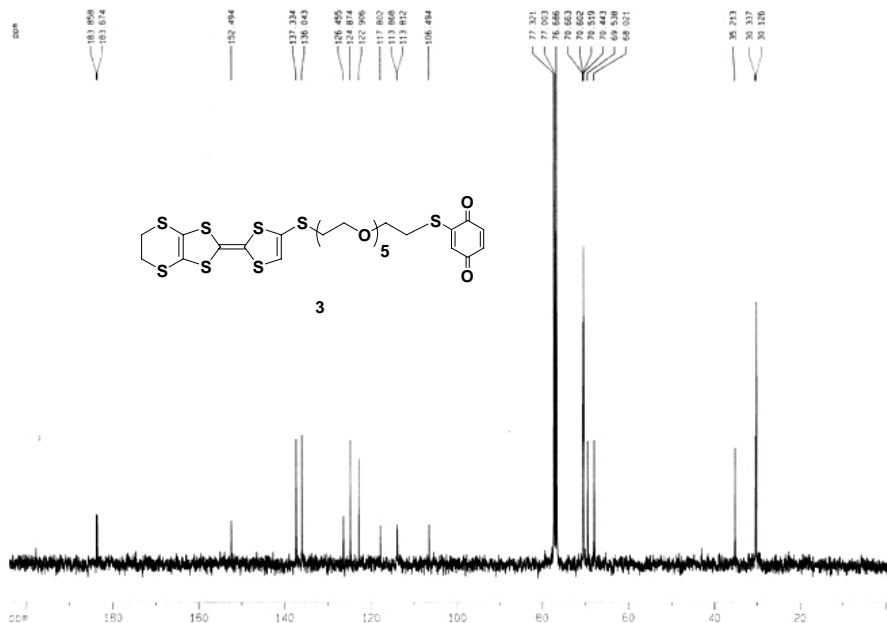

Current Data Parameters  
NAME 13C  
EXPNO 89  
PROCNO 1

F2 - Acquisition Parameters  
Date\_ 20060909  
Time 19.21  
INSTRUM AV400  
PROBHD 5 mm BBO BB-1H  
PULPROG zgpg30  
TD 65536  
SOLVENT CDCl3  
VS 105  
DS 0  
SWH 24509.805 Hz  
FIDRES 0.373990 Hz  
AQ 1.336844 sec  
RG 10.84  
SW 20.400 usec  
DE 6.00 usec  
TE 298.4 K  
D1 2.00000000 sec  
D11 0.00000000 sec  
MCHES1 0.00000000 sec  
MCHES2 0.01500000 sec

\*\*\*\*\* CHANNEL f1 \*\*\*\*\*  
NUC1 13C  
P1 6.30 usec  
PL1 -6.00 dB  
SFO1 100.6245064 MHz

\*\*\*\*\* CHANNEL f2 \*\*\*\*\*  
CPDPRG2 waltz16  
NUC2 1H  
PCPD2 80.00 usec  
PL2 -4.00 dB  
PL12 16.00 dB  
PL13 17.00 dB  
SFO2 400.1316005 MHz

F2 - Processing parameters  
SI 32768  
SF 100.6127773 MHz  
WDW EM  
SSB 0  
LB 3.00 Hz  
GB 0  
PC 0.10

1D NMR plot parameters  
CX 23.00 cm  
CY 15.00 cm  
FIDP 204.145 ppm  
F1 20529.60 Hz  
F2P -1.875 ppm  
F2 -188.13 Hz  
PMCH 8.90113 ppm/cm  
HZCM 901.20563 Hz/cm

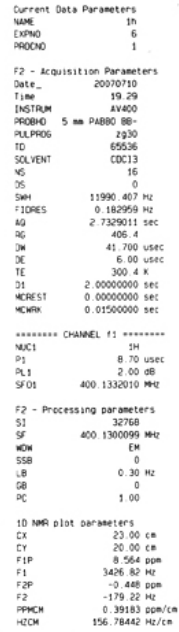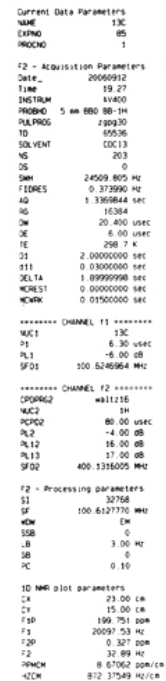

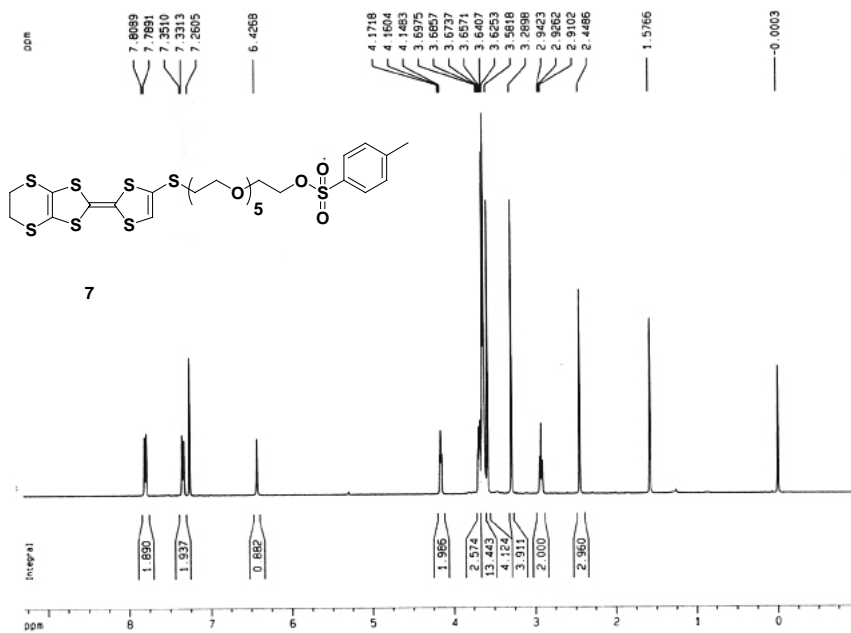

Current Data Parameters  
NAME 1H  
EXPNO 441  
PROCNO 1

F2 - Acquisition Parameters  
Date\_ 20070412  
Time 18.59  
INSTRUM AV400  
PROBHD 5 mm BBO BB-1H  
PULPROG zg30  
TD 32768  
SOLVENT CDCl<sub>3</sub>  
NS 16  
DS 0  
SWH 11195.683 Hz  
FIDRES 0.341360 Hz  
AQ 1.4647796 sec  
RG 1149.4  
AQ 44.700 usec  
DE 6.00 usec  
TE 300.0 K  
D1 2.00000000 sec  
MCREST 0.00000000 sec  
MCMRK 0.01500000 sec

\*\*\*\*\* CHANNEL f1 \*\*\*\*\*  
NUC1 1H  
P1 10.00 usec  
PL1 -1.20 dB  
SF01 400.1328139 MHz

F2 - Processing parameters  
SI 32768  
SF 400.1300086 MHz  
WDW EM  
SSB 0  
LB 0.30 Hz  
GB 0  
PC 1.00

1D NMR plot parameters  
CX 22.00 cm  
CY 10.00 cm  
F1P 9.308 ppm  
F1 3724.36 Hz  
F2P -1.000 ppm  
F2 -400.32 Hz  
FREQM 10.46555 ppm/cm  
GZCM 187.48091 Hz/cm

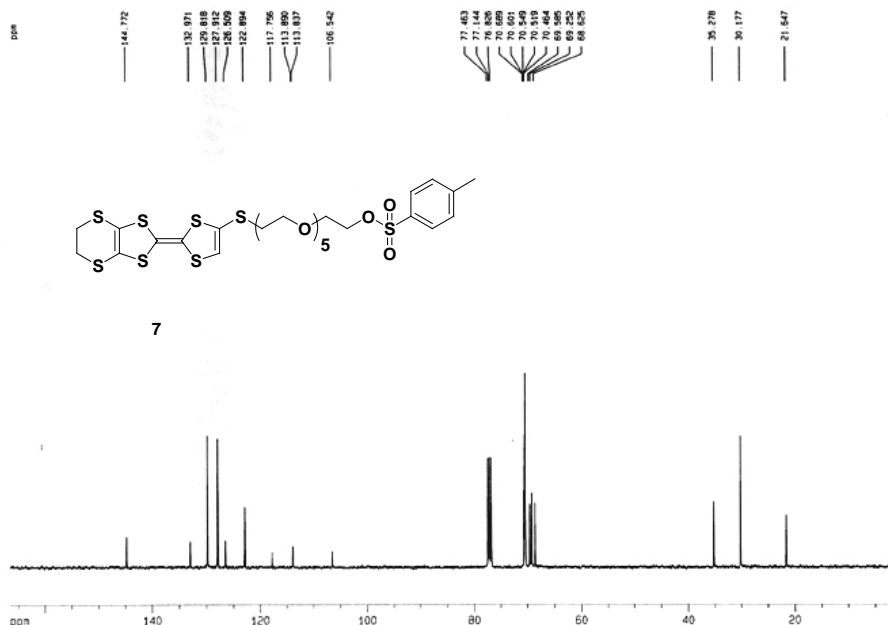

Current Data Parameters  
NAME 13C  
EXPNO 123  
PROCNO 1

F2 - Acquisition Parameters  
Date\_ 20070412  
Time 19.43  
INSTRUM AV400  
PROBHD 5 mm BBO BB-1H  
PULPROG zgpg30  
TD 65536  
SOLVENT CDCl<sub>3</sub>  
NS 132  
DS 0  
SWH 24509.800 Hz  
FIDRES 0.373990 Hz  
AQ 1.3368844 sec  
RG 15384  
AQ 20.400 usec  
DE 6.00 usec  
TE 300.0 K  
D1 2.00000000 sec  
D11 0.03000000 sec  
DELTA 1.89999999 sec  
MCREST 0.00000000 sec  
MCMRK 0.01500000 sec

\*\*\*\*\* CHANNEL f1 \*\*\*\*\*  
NUC1 13C  
P1 6.30 usec  
PL1 -6.00 dB  
SF01 100.6248964 MHz

\*\*\*\*\* CHANNEL f2 \*\*\*\*\*  
CPROG2 waltz16  
NUC2 1H  
PCPD2 80.00 usec  
PL2 -4.00 dB  
PL12 16.00 dB  
PL13 17.00 dB  
SF02 400.1316005 MHz

F2 - Processing parameters  
SI 32768  
SF 100.6127725 MHz  
WDW EM  
SSB 0  
LB 3.00 Hz  
GB 0  
PC 0.10

1D NMR plot parameters  
CX 23.00 cm  
CY 5.00 cm  
F1P 168.599 ppm  
F1 15752.02 Hz  
F2P 0.860 ppm  
F2 86.51 Hz  
FREQM 7.26606 ppm/cm  
GZCM 725.02099 Hz/cm

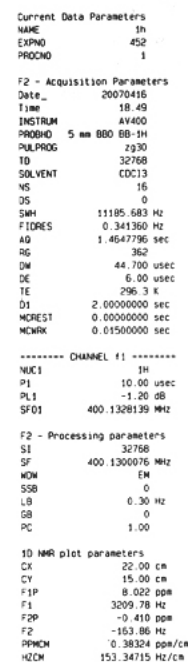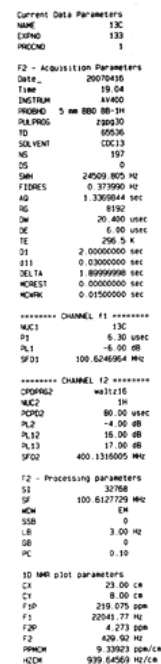

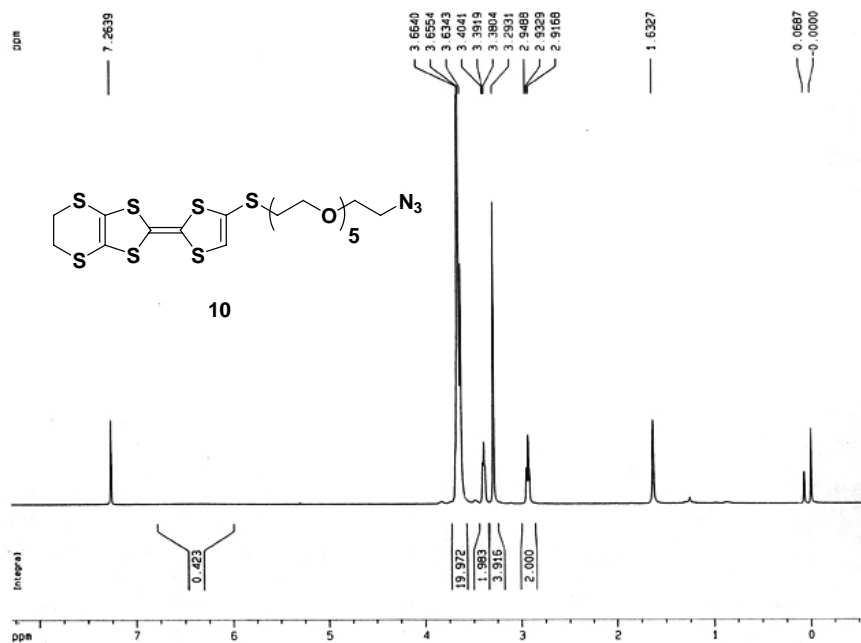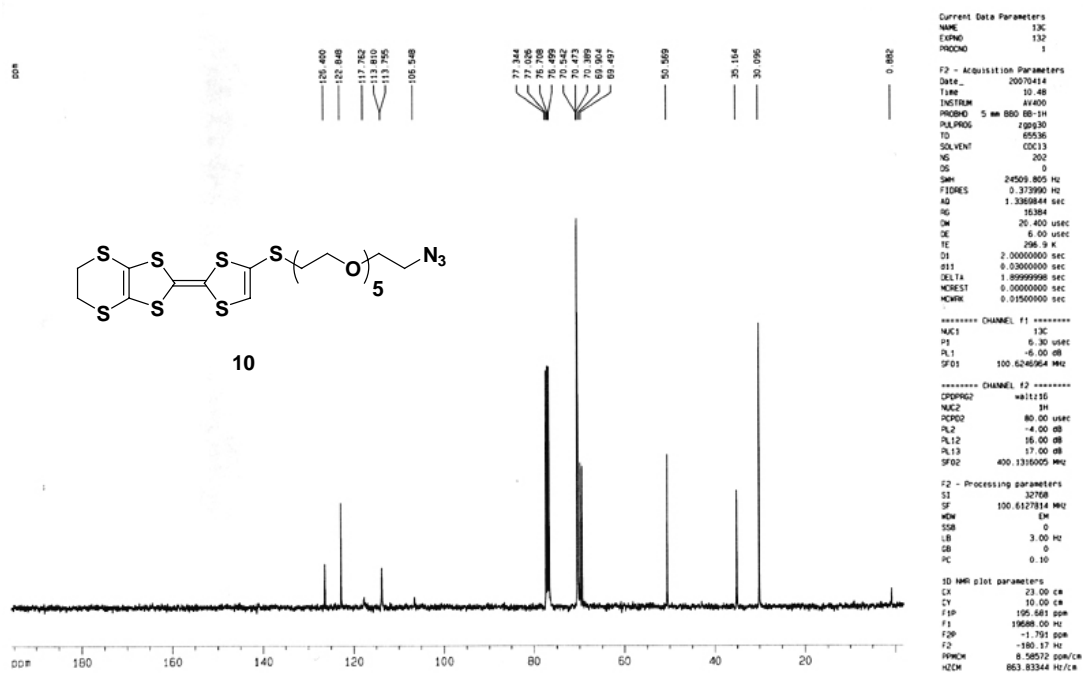

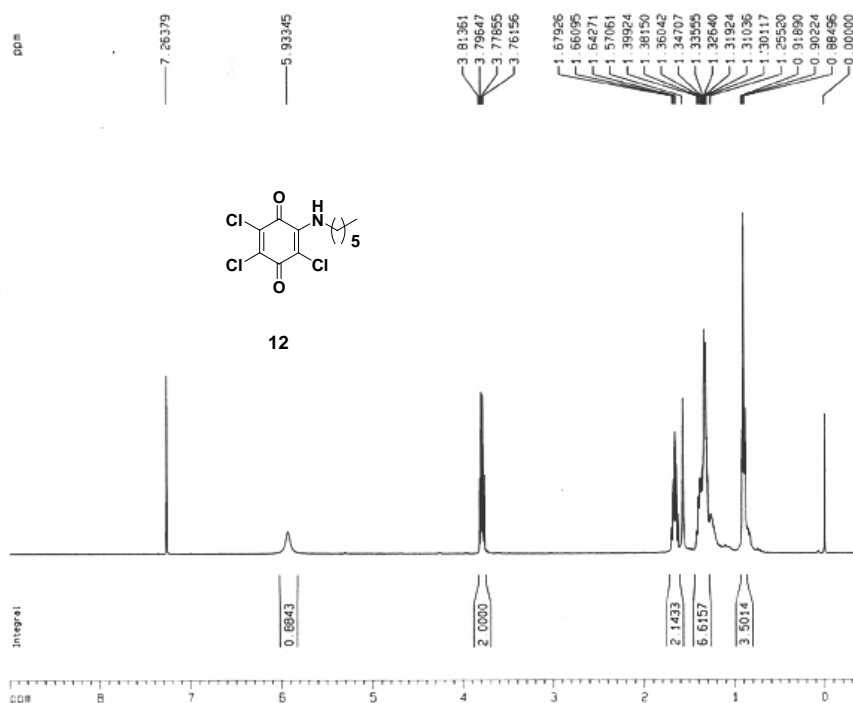

Current Data Parameters  
NAME 1H  
EXPNO 62  
PROCNO 1

F2 - Acquisition Parameters  
Date\_ 20070831  
Time 21.20  
INSTRUM AV400  
PROBHD 5 mm PABBO BB-  
PULPROG zgpg30  
TD 65536  
SOLVENT CDCl3  
NS 8  
DS 2  
SWH 8278.146 Hz  
FIDRES 0.126314 Hz  
AQ 3.9584243 sec  
RG 256  
QM 60.400 usec  
DE 6.00 usec  
TE 300.0 K  
D1 1.00000000 sec  
MCREST 0.00000000 sec  
MCWID 0.01500000 sec

\*\*\*\*\* CHANNEL f1 \*\*\*\*\*  
NUC1 1H  
P1 13.50 usec  
PL1 -1.00 dB  
SFO1 400.1324710 MHz

F2 - Processing parameters  
SI 32768  
SF 400.1300084 MHz  
WDW EM  
SSB 0  
LB 0.30 Hz  
GB 0  
PC 1.00

1D NMR plot parameters  
CX 20.00 cm  
CY 8.00 cm  
FIP 8.000 ppm  
F1 3601.17 Hz  
F2 -0.375 ppm  
F2 -150.25 MHz  
PPHMH 0.46878 ppm/cm  
H2CH 187.57095 Hz/cm

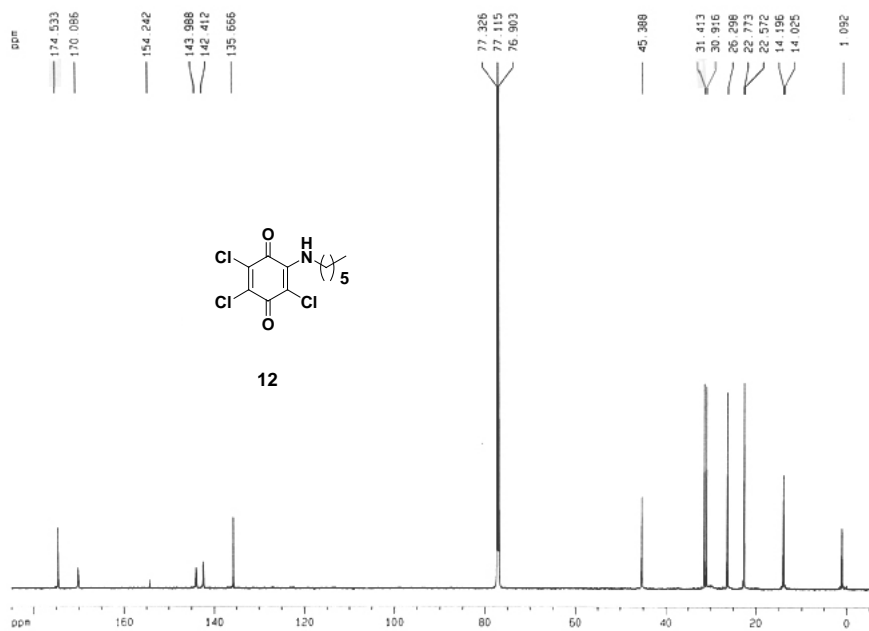

Current Data Parameters  
NAME carbon  
EXPNO 80  
PROCNO 1

F2 - Acquisition Parameters  
Date\_ 20070817  
Time 20.17  
INSTRUM av400  
PROBHD 5 mm BBI 1H-BB  
PULPROG zgpg30  
TD 65536  
SOLVENT DMSO  
NS 14719  
DS 0  
SWH 37593.984 Hz  
FIDRES 0.573639 Hz  
AQ 0.8716921 sec  
RG 812.7  
QM 13.300 usec  
DE 6.00 usec  
TE 297.5 K  
D1 2.00000000 sec  
D11 0.00000000 sec  
MCREST 0.00000000 sec  
MCWID 0.01500000 sec

\*\*\*\*\* CHANNEL f1 \*\*\*\*\*  
NUC1 13C  
P1 14.50 usec  
PL1 -2.00 dB  
SFO1 150.9178993 MHz

\*\*\*\*\* CHANNEL f2 \*\*\*\*\*  
CPDPRG2 waltz16  
NUC2 1H  
PCPD2 88.50 usec  
PL2 -1.00 dB  
PL12 19.40 dB  
SFO2 400.1342009 MHz

F2 - Processing parameters  
SI 32768  
SF 150.9027957 MHz  
WDW EM  
SSB 0  
LB 3.00 Hz  
GB 0  
PC 1.10

1D NMR plot parameters  
CX 23.00 cm  
CY 20.50 cm  
FIP 185.024 ppm  
F1 27920.63 Hz  
F2 -5.740 ppm  
F2 -1017.12 Hz  
PPHMH 8.33757 ppm/cm  
H2CH 1058.16321 Hz/cm

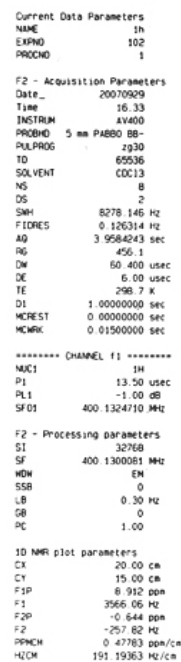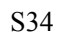

Supplement: Supplementary file 1 [file 4633849]
